# Supplementary material
Source: PubMed Central journal article supplement (PMC4550537)
Supplement: NIHMS690987-supplement-supplement_1.pdf [file NIHMS690987-supplement-supplement_1.pdf]

1 SUPPLEMENTAL METHODS

2 National Comprehensive Cancer Network (NCCN) Guideline Classification

3 Subjects were considered to fulfill NCCN guidelines for Lynch syndrome (LS) testing<sup>1</sup> if they had a  
4 personal history of any of the following: colorectal cancer (CRC) or endometrial cancer (EC) at age <50;  
5  $\geq 2$  LS-associated cancers, regardless of age; CRC at any age plus a first-degree relative (FDR) with a LS-  
6 associated cancer at age <50; CRC at any age plus  $\geq 2$  FDR/second-degree relatives (SDR) with a LS-  
7 associated cancer at any age.

8

9 Regardless of their personal history, subjects were also considered to fulfill NCCN guidelines for LS  
10 testing<sup>1</sup> if they had a family history of any of the following: a FDR/SDR with CRC age <50; a FDR/SDR with  
11 EC age <50; a FDR/SDR with  $\geq 2$  LS-associated cancers at any age; a FDR/SDR with CRC at any age plus  
12 another FDR/SDR/third-degree relative (TDR) with any LS-associated cancer at age <50; a FDR with CRC  
13 at any age plus  $\geq 2$  FDR/SDR/TDR with any LS-associated cancer at any age. Unless otherwise specified on  
14 the test request form, all family history data were assumed to be from the same side of the subject's  
15 family.

16

17 Subjects were considered to fulfill NCCN guidelines for hereditary breast/ovarian cancer testing for  
18 *BRCA1* and *BRCA2* mutations<sup>2</sup> if they had a personal history of any of the following: breast cancer (BC) at  
19 age  $\leq 45$ ; male BC at any age; ovarian cancer (OC) at any age; BC at any age plus  $\geq 1$  FDR/SDR/TDR with  
20 BC at age  $\leq 50$ ; BC at any age plus  $\geq 1$  FDR/SDR/TDR with OC or male BC; BC at any age plus  $\geq 2$   
21 FDR/SDR/TDR with BC at any age; BC at any age plus  $\geq 2$  FDR/SDR/TDR with pancreatic cancer (PC) at any  
22 age; PC at any age plus  $\geq 2$  FDR/SDR/TDR with BC, OC, or PC.

23

24 Regardless of their personal history, subjects were also considered to fulfill NCCN guidelines for  
25 hereditary breast/ovarian cancer testing for *BRCA1* and *BRCA2* mutations if they had a family history of  
26 any of the following:  $\geq 1$  FDR/SDR with OC at any age;  $\geq 1$  FDR/SDR with BC at age  $\leq 45$ ;  $\geq 1$  FDR/SDR with  
27 male BC at any age;  $\geq 1$  FDR/SDR with BC plus  $\geq 1$  FDR/SDR/TDR with BC, at least one of which was at age  
28  $\leq 50$ ;  $\geq 1$  FDR/SDR with BC at any age plus  $\geq 2$  FDR/SDR/TDR with BC at any age;  $\geq 1$  FDR/SDR with BC plus  
29  $\geq 1$  FDR/SDR/TDR with male BC;  $\geq 1$  FDR/SDR with BC plus  $\geq 1$  FDR/SDR/TDR with OC;  $\geq 1$  FDR/SDR with PC  
30 plus  $\geq 2$  FDR/SDR/TDR with BC, OC, or PC;  $\geq 1$  FDR/SDR with PC plus  $\geq 1$  FDR/SDR/TDR with a history of  
31 two or more of: BC, OC, or PC. Unless otherwise specified on the test request form, all family history  
32 data were assumed to be from the same side of the subject's family.

33

#### 34 Design of Custom Primer Library for Next-Generation Sequencing (NGS) Target Enrichment

35 A custom primer library was designed, which includes regions of interest across 25 genes (Table 1) using  
36 the RainDance microdroplet PCR system (RainDance Technologies, Inc., Lexington, MA). The library  
37 design process began with identifying regions of interest, usually coding exons, for a panel of gene  
38 targets. This was done by evaluating results from the Consensus CDS database  
39 (<http://www.ncbi.nlm.nih.gov/projects/CCDS/CcidsBrowse.cgi>) and comparing them with published  
40 literature. In the event of multiple reported transcripts, a review of the available literature was  
41 performed to determine the transcript(s) most relevant for patient testing. For coding exons, the  
42 sequencing regions were flanked by 20 bases of upstream and 10 bases of downstream intronic  
43 sequence to allow for evaluation of variants that occur in conserved, proximal splicing elements.  
44 Automated primer design of the specified regions was performed by the supplier (RainDance  
45 Technologies, Inc., Lexington, MA). This design process included the comparison of putative priming  
46 sites to public variant databases and the current genome build  
47 (<http://www.ncbi.nlm.nih.gov/projects/genome/assembly/grc/human/>) to avoid non-specific priming

48 and common SNPs at primer binding sites. Primer sequences were also checked for predicted primer-  
49 primer interactions. Primer designs that pass these filters were arranged into multiplexes of five  
50 amplicons to minimize DNA input requirements and the resulting reagents were dropletized into a  
51 custom library (RainDance). The RainDance library design involved an iterative process with multiple  
52 rounds of testing; the version of the library used in this study contained a combination of multiplexed  
53 and single-plex PCR reactions.

54

#### 55 Sample Preparation and Next Generation Sequencing

56 Genomic DNA was extracted from blood (QIASymphony, Qiagen, Venlo, Netherlands) and was  
57 fragmented (SonicMan, Brooks Life Science Systems, Spokane, WA, USA) to approximately 3 kb to  
58 facilitate NGS sample preparation. Fragmented DNA was combined with PCR master mix containing the  
59 necessary buffers, polymerase and nucleotides. The reaction mix containing DNA was dropletized and  
60 merged with droplets containing a custom amplicon primer library using a high-throughput microfluidic  
61 emulsion PCR system (RainDance Thunderstorm). This process generated roughly 40,000 droplets  
62 corresponding to PCR microreactions per patient sample. The resulting emulsion was amplified for 55  
63 cycles on a Mastercycler Pro thermalcycler (Eppendorf, Hamburg, Germany). The emulsion was broken  
64 up according to RainDance protocols and the aqueous PCR products were purified using AMPure XP  
65 (Beckman Coulter, Brea, California). Secondary PCR was performed to attach a six nucleotide identifier,  
66 specific for each sample within a batch, and recognition sites for NGS. The products were purified,  
67 pooled, and then sequenced on an Illumina HiSeq 2500 (Illumina, Inc., San Diego, CA, USA) to generate  
68 paired end, 2 x 150 bp reads according to the manufacturer's instructions.

69

70 To sequence portions of the *PMS2* and *CHEK2* genes with highly homologous pseudogenes, target  
71 enrichment was modified to include long-range PCR. The primary PCR was performed using LA Taq Hot

72 Start (Takara Bio Inc., Otsu, Japan) on 50ng of genomic DNA to generate gene-specific long range  
73 amplicons (LRA). The gene-specific LRA products were diluted 1:10,000 and a second round of PCR was  
74 performed to attach an index sequence specific for each sample within a batch and recognition sites for  
75 NGS. Equal volumes of each secondary amplicon product for all LRAs were combined per sample. Equal  
76 amounts of 96 samples were combined and diluted to 2nM for sequencing on the Illumina MiSeq  
77 (Illumina, Inc., San Diego, CA, USA) for 2 x 150 bp paired end sequencing reads.

78

#### 79 NGS Data Analysis

80 DNA sequence reads were assessed using Illumina Sequence Control Software with Real Time Analysis  
81 (Illumina, Inc., San Diego, CA, USA). Sequence reads were trimmed at the point where quality scores  
82 drop below Q30 using an optimized Burrows-Wheeler Aligner trimming approach and then compared to  
83 a list of expected amplicon sequences. For *CHEK2* and *PMS2*, JAligner (Open Source -  
84 <http://jaligner.sourceforge.net/>) was used to determine which DNA target the sequencing read correctly  
85 matched; sequencing reads that matched the pseudogene better than the gene target were discarded.  
86 Sequence variants were identified by aligning reads using JAligner and comparing to the reference  
87 (wildtype) sequence. The average depth of coverage for samples in this study was over 1000X.

88

89 Large rearrangement (LR) detection was performed by relative copy number analysis of the NGS data in  
90 this study. The number of reads that mapped back to each exon was normalized using the total number  
91 of mapped back reads across all genes for that sample. For each run, or group of similar runs, a median  
92 normalized and the read count value was determined for each exon. Samples were then evaluated to  
93 see if their normalized read count average, across a given exon or partial exon, was  $\geq 1.25X$  or  $\leq 0.75X$  the  
94 median value. If a relative copy number value was  $\geq 1.25X$  the median value, the sample was determined  
95 to have a heterozygous duplication. If a value was  $\leq 0.75X$  the median value, the sample was determined

96 to have a heterozygous deletion.

97

98 The median noise of centered normalized read counts for all exons with normal copy number of 2 was  
99 determined. The CV (noise in a sample) was calculated as follows:

100 Median (Absolute Value (1-S) x 2) = Noise in a sample (CV)

101  $S$  (centered normalized read counts for a given exon and sample) =  $N / (\text{median } N \text{ across all samples})$

102  $N$  (normalized read count for a given exon and sample) =  $c / C$

103  $c$  = Read count for an exon

104  $C$  = Sum of all  $c$  for a sample

105 *PMS2* exons 1-5, 11-15, and *CHEK2* exons 10-14, were excluded from this calculation as they do not hold  
106 to the same copy number assumption. If the calculated CV value was  $<0.08$ , then the sample was  
107 included for NGS data analysis of large rearrangements. If the CV value was  $\geq 0.08$ , the sample was  
108 rejected for NGS LR analysis. By these criteria 90% of the samples in this study were eligible for LR  
109 analysis. Positive and negative calls made by the algorithm were reviewed by human analysts.

110

#### 111 Pathogenicity Classification

112 All sequence variations and large rearrangements detected by the 25-gene panel were classified for  
113 pathogenicity into the following categories, as previously described: deleterious mutation, suspected  
114 deleterious mutation, variants of uncertain clinical significance (VUS), favor polymorphism, and  
115 polymorphism.<sup>3,4</sup> Based on recommendations from the American College of Medical Genetics (ACMG),<sup>4</sup>  
116 deleterious mutations included nonsense and frameshift mutations predicted to result in protein  
117 truncation, as well as specific missense and intronic alterations that have been previously recognized as  
118 deleterious based on supporting linkage, functional, biochemical, and/or statistical evidence. Suspected  
119 deleterious mutations included alterations for which available evidence indicated a high likelihood – but

120 not confirmation – of pathogenicity. Individuals with deleterious or suspected deleterious genomic  
121 alterations were collectively defined as having “pathogenic” mutations (Supplemental Table 1).<sup>4-42</sup>  
122 Alterations were deemed favor polymorphism or polymorphism if available evidence indicated a low  
123 likelihood that such alterations altered normal gene expression and/or function. Alterations were  
124 classified as VUS if data were insufficient to support either a deleterious or benign interpretation  
125 (Supplemental Table 2 and Supplemental Figure).<sup>4</sup>

126

#### 127 Validation of multigene panel

128 The performance characteristics of the 25-gene panel used in this study have been evaluated in a  
129 separate validation study.<sup>43</sup> In this validation study, the sequencing component of the 25-gene panel  
130 was validated by comparing the results of NGS with Sanger sequencing on 100 anonymized DNA  
131 samples. Samples were sequenced for the coding regions and proximal splice sites of all genes except  
132 for *EPCAM*, which is evaluated only for large rearrangements involving the terminal exons. A total of  
133 3923 variants were identified including 3884 single nucleotide substitutions and 39 small insertions or  
134 deletions. These results showed 100% concordance between NGS and Sanger sequencing. The  
135 validation study gives an estimated analytical sensitivity of >99.92% (lower limit of the 95% confidence  
136 interval) and an estimated analytical specificity of >99.99% (lower limit of the 95% confidence interval)  
137 for the clinical assay (Minitab version 15, 1 proportion test, Exact method). Reproducibility, both within  
138 and between batches, was confirmed by running four samples in triplicate across three separate batches  
139 and verifying identical results.

140

141 Large rearrangement analysis of the 25-gene panel was also validated in this subsequent study.<sup>43</sup> All  
142 genes except for *PMS2* and *CHEK2* were validated for large rearrangement review using both microarray  
143 comparative genomic hybridization (CGH) and NGS for large rearrangement dosage analysis. Microarray

144 CGH was validated by correctly identifying all 51 LR positive samples among 212 anonymized samples.  
145 NGS dosage analysis requires higher DNA input volumes and was, therefore, validated on a subset of 49  
146 LR positive samples among 110 anonymized samples. One LR positive sample failed during laboratory  
147 processing but NGS dosage analysis correctly identified all 48 LR positive samples that were reviewed as  
148 part of the validation and by both large rearrangement detection assays. Large rearrangement review  
149 for *PMS2* and *CHEK2* used multiplex ligation-dependent probe amplification (MLPA) and correctly  
150 identified all 5 LR positive samples among 110 anonymized samples in the validation set.

151

152

153 SUPPLEMENTAL MATERIAL REFERENCES

- 154 1. NCCN Clinical Practice Guidelines in Oncology. Genetic/Familial High-Risk Assessment:  
155 Colorectal. Version 2.2014.  
156 [http://www.nccn.org/professionals/physician\\_gls/pdf/genetics\\_colon.pdf](http://www.nccn.org/professionals/physician_gls/pdf/genetics_colon.pdf). Accessed January 20,  
157 2015.
- 158 2. NCCN Clinical Practice Guidelines in Oncology. Genetic/Familial High-Risk Assessment: Breast  
159 and Ovarian. Version 2.2014.  
160 [http://www.nccn.org/professionals/physician\\_gls/pdf/genetics\\_screening.pdf](http://www.nccn.org/professionals/physician_gls/pdf/genetics_screening.pdf). Accessed  
161 January 20, 2015.
- 162 3. Eggington JM, Bowles KR, Moyes K, et al. A comprehensive laboratory-based program for  
163 classification of variants of uncertain significance in hereditary cancer genes. *Clin Genet* 2013.
- 164 4. Richards CS, Bale S, Bellissimo DB, et al. ACMG recommendations for standards for  
165 interpretation and reporting of sequence variations: Revisions 2007. *Genet Med* 2008;10:294-  
166 300.
- 167 5. Al-Tassan N, Chmiel NH, Maynard J, et al. Inherited variants of MYH associated with somatic  
168 G:C-->T:A mutations in colorectal tumors. *Nat Genet* 2002;30:227-32.
- 169 6. Jones S, Emmerson P, Maynard J, et al. Biallelic germline mutations in MYH predispose to  
170 multiple colorectal adenoma and somatic G:C-->T:A mutations. *Hum Mol Genet* 2002;11:2961-7.
- 171 7. Sampson JR, Jones N. MUTYH-associated polyposis. *Best Pract Res Clin Gastroenterol*  
172 2009;23:209-18.
- 173 8. Warren JJ, Pohlhaus TJ, Changela A, et al. Structure of the human MutSalpha DNA lesion  
174 recognition complex. *Mol Cell* 2007;26:579-92.
- 175 9. Goldgar DE, Easton DF, Byrnes GB, et al. Genetic evidence and integration of various data  
176 sources for classifying uncertain variants into a single model. *Hum Mutat* 2008;29:1265-72.
- 177 10. Easton DF, Deffenbaugh AM, Pruss D, et al. A systematic genetic assessment of 1,433 sequence  
178 variants of unknown clinical significance in the BRCA1 and BRCA2 breast cancer-predisposition  
179 genes. *Am J Hum Genet* 2007;81:873-83.
- 180 11. Wijnen J, Khan PM, Vasen H, et al. Majority of hMLH1 mutations responsible for hereditary  
181 nonpolyposis colorectal cancer cluster at the exonic region 15-16. *Am J Hum Genet*  
182 1996;58:300-7.
- 183 12. Pagenstecher C, Wehner M, Friedl W, et al. Aberrant splicing in MLH1 and MSH2 due to exonic  
184 and intronic variants. *Hum Genet* 2006;119:9-22.
- 185 13. Raevaara TE, Vaccaro C, Abdel-Rahman WM, et al. Pathogenicity of the hereditary colorectal  
186 cancer mutation hMLH1 del616 linked to shortage of the functional protein. *Gastroenterology*  
187 2003;125:501-9.
- 188 14. Liu B, Parsons RE, Hamilton SR, et al. hMSH2 mutations in hereditary nonpolyposis colorectal  
189 cancer kindreds. *Cancer Res* 1994;54:4590-4.
- 190 15. **Aceto G, Curia MC**, Veschi S, et al. Mutations of APC and MYH in unrelated Italian patients with  
191 adenomatous polyposis coli. *Hum Mutat* 2005;26:394.
- 192 16. **Russell AM, Zhang J, Luz J**, et al. Prevalence of MYH germline mutations in Swiss APC mutation-  
193 negative polyposis patients. *Int J Cancer* 2006;118:1937-40.
- 194 17. Auclair J, Busine MP, Navarro C, et al. Systematic mRNA analysis for the effect of MLH1 and  
195 MSH2 missense and silent mutations on aberrant splicing. *Hum Mutat* 2006;27:145-54.
- 196 18. Casey G, Lindor NM, Papadopoulos N, et al. Conversion analysis for mutation detection in MLH1  
197 and MSH2 in patients with colorectal cancer. *JAMA* 2005;293:799-809.
- 198 19. Chenevix-Trench G, Spurdle AB, Gatei M, et al. Dominant negative ATM mutations in breast  
199 cancer families. *J Natl Cancer Inst* 2002;94:205-15.

- 200 20. Bernstein JL, Teraoka S, Southey MC, et al. Population-based estimates of breast cancer risks  
201 associated with ATM gene variants c.7271T>G and c.1066-6T>G (IVS10-6T>G) from the Breast  
202 Cancer Family Registry. *Hum Mutat* 2006;27:1122-8.
- 203 21. Koonin EV, Altschul SF, Bork P. BRCA1 protein products ... Functional motifs. *Nat Genet*  
204 1996;13:266-8.
- 205 22. Huyton T, Bates PA, Zhang X, et al. The BRCA1 C-terminal domain: structure and function. *Mutat*  
206 *Res* 2000;460:319-32.
- 207 23. Mirkovic N, Marti-Renom MA, Weber BL, et al. Structure-based assessment of missense  
208 mutations in human BRCA1: implications for breast and ovarian cancer predisposition. *Cancer*  
209 *Res* 2004;64:3790-7.
- 210 24. Moisis AL, Jarvinen H, Peltomaki P. Genetic and clinical characterisation of familial adenomatous  
211 polyposis: a population based study. *Gut* 2002;50:845-50.
- 212 25. Nakagawa H, Lockman JC, Frankel WL, et al. Mismatch repair gene PMS2: disease-causing  
213 germline mutations are frequent in patients whose tumors stain negative for PMS2 protein, but  
214 paralogous genes obscure mutation detection and interpretation. *Cancer Res* 2004;64:4721-7.
- 215 26. Auclair J, Leroux D, Desseigne F, et al. Novel biallelic mutations in MSH6 and PMS2 genes: gene  
216 conversion as a likely cause of PMS2 gene inactivation. *Hum Mutat* 2007;28:1084-90.
- 217 27. Senter L, Clendenning M, Sotamaa K, et al. The clinical phenotype of Lynch syndrome due to  
218 germ-line PMS2 mutations. *Gastroenterology* 2008;135:419-28.
- 219 28. Vaughn CP, Robles J, Swensen JJ, et al. Clinical analysis of PMS2: mutation detection and  
220 avoidance of pseudogenes. *Hum Mutat* 2010;31:588-93.
- 221 29. Herkert JC, Niessen RC, Olderode-Berends MJ, et al. Paediatric intestinal cancer and polyposis  
222 due to bi-allelic PMS2 mutations: case series, review and follow-up guidelines. *Eur J Cancer*  
223 2011;47:965-82.
- 224 30. Raevaara TE, Korhonen MK, Lohi H, et al. Functional significance and clinical phenotype of  
225 nontruncating mismatch repair variants of MLH1. *Gastroenterology* 2005;129:537-49.
- 226 31. Blasi MF, Ventura I, Aquilina G, et al. A human cell-based assay to evaluate the effects of  
227 alterations in the MLH1 mismatch repair gene. *Cancer Res* 2006;66:9036-44.
- 228 32. Sampson JR, Dolwani S, Jones S, et al. Autosomal recessive colorectal adenomatous polyposis  
229 due to inherited mutations of MYH. *Lancet* 2003;362:39-41.
- 230 33. Tournier I, Vezain M, Martins A, et al. A large fraction of unclassified variants of the mismatch  
231 repair genes MLH1 and MSH2 is associated with splicing defects. *Hum Mutat* 2008;29:1412-24.
- 232 34. Rahner N, Friedrichs N, Wehner M, et al. Nine novel pathogenic germline mutations in MLH1,  
233 MSH2, MSH6 and PMS2 in families with Lynch syndrome. *Acta Oncol* 2007;46:763-9.
- 234 35. Trojan J, Zeuzem S, Randolph A, et al. Functional analysis of hMLH1 variants and HNPCC-related  
235 mutations using a human expression system. *Gastroenterology* 2002;122:211-9.
- 236 36. Yuan ZQ, Wong N, Foulkes WD, et al. A missense mutation in both hMSH2 and APC in an  
237 Ashkenazi Jewish HNPCC kindred: implications for clinical screening. *J Med Genet* 1999;36:790-  
238 3.
- 239 37. Foulkes WD, Thiffault I, Gruber SB, et al. The founder mutation MSH2\*1906G-->C is an  
240 important cause of hereditary nonpolyposis colorectal cancer in the Ashkenazi Jewish  
241 population. *Am J Hum Genet* 2002;71:1395-412.
- 242 38. Williams RS, Lee MS, Hau DD, et al. Structural basis of phosphopeptide recognition by the BRCT  
243 domain of BRCA1. *Nat Struct Mol Biol* 2004;11:519-25.
- 244 39. **Lovelock PK, Spurdle AB, Mok MT, et al.** Identification of BRCA1 missense substitutions that  
245 confer partial functional activity: potential moderate risk variants? *Breast Cancer Res*  
246 2007;9:R82.

- 247 40. Chang S, Wang RH, Akagi K, et al. Tumor suppressor BRCA1 epigenetically controls oncogenic  
248 microRNA-155. *Nat Med* 2011;17:1275-82.
- 249 41. **Mohammadi L, Vreeswijk MP**, Oldenburg R, et al. A simple method for co-segregation analysis  
250 to evaluate the pathogenicity of unclassified variants; BRCA1 and BRCA2 as an example. *BMC*  
251 *Cancer* 2009;9:211.
- 252 42. Ricevuto E, Sobol H, Stoppa-Lyonnet D, et al. Diagnostic strategy for analytical scanning of  
253 BRCA1 gene by fluorescence-assisted mismatch analysis using large, bifluorescently labeled  
254 amplicons. *Clin Cancer Res* 2001;7:1638-46.
- 255 43. Judkins T, Leclair B, Bowles K, et al. Development and analytical validation of a 25-gene next  
256 generation sequencing panel that includes the BRCA1 and BRCA2 genes to assess hereditary  
257 cancer risk. *BMC Cancer* 2015; In press.

258

259 Author names in bold designate shared co-first authors.

260

Supplemental Table 1: Germline details of 182 individuals found to carry pathogenic mutations with a 25-gene hereditary cancer panel

| Subject ID | Gene mutated (Lynch) | HGVS mutation name (Lynch)       | Gene mutated (non-Lynch) | HGVS mutation name (non-Lynch) |
|------------|----------------------|----------------------------------|--------------------------|--------------------------------|
| 1095216833 | <i>MLH1</i>          | c.1279C>T (p.Gln427*)            |                          |                                |
| 1095079933 | <i>MLH1</i>          | c.1435_1453del (p.Val479Ilefs*6) |                          |                                |
| 1086153088 | <i>MLH1</i>          | c.1517T>C (p.Val506Ala)          |                          |                                |
| 0159657500 | <i>MLH1</i>          | c.1746del (p.Phe583Leufs*8)      |                          |                                |
| 1093189976 | <i>MLH1</i>          | c.1852_1854del (p.Lys618del)     |                          |                                |
| 1097149016 | <i>MLH1</i>          | c.1890dupT (p.Asp631*)           |                          |                                |
| 0159893397 | <i>MLH1</i>          | c.1975C>T (p.Arg659*)            |                          |                                |
| 1093190211 | <i>MLH1</i>          | c.1989+3dupC                     |                          |                                |
| 1092248139 | <i>MLH1</i>          | c.199G>A (p.Gly67Arg)            |                          |                                |
| 1092247994 | <i>MLH1</i>          | c.208-3C>G                       |                          |                                |
| 1093189969 | <i>MLH1</i>          | c.298C>T (p.Arg100*)             |                          |                                |
| 1093189929 | <i>MLH1</i>          | c.350C>T (p.Thr117Met)           |                          |                                |
| 1097162685 | <i>MLH1</i>          | c.380G>T (p.Arg127Ile)           |                          |                                |
| 1092248112 | <i>MLH1</i>          | c.544A>G (p.Arg182Gly)           |                          |                                |
| 1095079935 | <i>MLH1</i>          | c.546-2A>G                       |                          |                                |
| 1086153104 | <i>MLH1</i>          | c.589-2A>G                       |                          |                                |
| 1095216822 | <i>MLH1</i>          | c.589-2A>G                       |                          |                                |
| 1095079895 | <i>MLH1</i>          | c.676C>T (p.Arg226*)             |                          |                                |
| 1086153352 | <i>MLH1</i>          | c.677G>A (p.Arg226Gln)           |                          |                                |
| 1092248097 | <i>MLH1</i>          | c.677G>A (p.Arg226Gln)           |                          |                                |
| 1092248246 | <i>MLH1</i>          | c.677G>A (p.Arg226Gln)           |                          |                                |
| 1086153414 | <i>MLH1</i>          | c.755C>G (p.Ser252*)             |                          |                                |
| 1093189911 | <i>MLH1</i>          | c.790+2T>C                       |                          |                                |

|            |             |                                       |
|------------|-------------|---------------------------------------|
| 1097149010 | <i>MLH1</i> | c.883A>G (p.Ser295Gly)                |
| 1095188508 | <i>MLH1</i> | c.884+4A>G                            |
| 1092248249 | <i>MLH1</i> | c.971dupA<br>(p.Arg325Alafs*37)       |
| 0159657452 | <i>MLH1</i> | del exon 13                           |
| 1095112480 | <i>MLH1</i> | del exon 5                            |
| 1095112487 | <i>MLH1</i> | del exons 1-13                        |
| 1095188520 | <i>MLH1</i> | del exons 1-13                        |
| 1092248006 | <i>MLH1</i> | dup exons 6-12                        |
| 1086153113 | <i>MSH2</i> | c.1076+1G>A                           |
| 1097162663 | <i>MSH2</i> | c.1076+1G>A                           |
| 1086153044 | <i>MSH2</i> | c.124_127dupTTCT<br>(p.Tyr43Phefs*40) |
| 1095188535 | <i>MSH2</i> | c.1444A>T (p.Arg482*)                 |
| 1092248225 | <i>MSH2</i> | c.1511-1G>A                           |
| 1097149017 | <i>MSH2</i> | c.1552_1553del<br>(p.Gln518Valfs*10)  |
| 0159657472 | <i>MSH2</i> | c.1700_1704del<br>(p.Lys567Argfs*3)   |
| 0159657450 | <i>MSH2</i> | c.1760-3C>G                           |
| 1095112429 | <i>MSH2</i> | c.1906G>C (p.Ala636Pro)               |
| 0159891914 | <i>MSH2</i> | c.1968C>A (p.Tyr656*)                 |
| 1097162697 | <i>MSH2</i> | c.2038C>T (p.Arg680*)                 |
| 0159893404 | <i>MSH2</i> | c.2047G>A (p.Gly683Arg)               |
| 1097149031 | <i>MSH2</i> | c.2047G>A (p.Gly683Arg)               |
| 1095216850 | <i>MSH2</i> | c.2210+1G>A                           |
| 0159657471 | <i>MSH2</i> | c.2222_2223del<br>(p.Lys741Argfs*8)   |
| 1086153380 | <i>MSH2</i> | c.2291G>A (p.Trp764*)                 |
| 1093190203 | <i>MSH2</i> | c.2634+1G>A                           |

|            |             |                                    |
|------------|-------------|------------------------------------|
| 1092248052 | <i>MSH2</i> | c.367-1G>A                         |
| 1092248028 | <i>MSH2</i> | c.587del<br>(p.Pro196Glnfs*18)     |
| 1086153076 | <i>MSH2</i> | c.842C>G (p.Ser281*)               |
| 1097162637 | <i>MSH2</i> | c.914_923del<br>(p.Ala305Glnfs*23) |
| 1097162639 | <i>MSH2</i> | c.942+2T>A                         |
| 1092248051 | <i>MSH2</i> | c.942+3A>T                         |
| 1093189908 | <i>MSH2</i> | c.942+3A>T                         |
| 1093189960 | <i>MSH2</i> | c.942+3A>T                         |
| 1095079883 | <i>MSH2</i> | c.942+3A>T                         |
| 1093190258 | <i>MSH2</i> | del exon 3                         |
| 1086153348 | <i>MSH2</i> | del exon 8                         |
| 0159657410 | <i>MSH2</i> | del exons 1-6                      |
| 0159893399 | <i>MSH2</i> | del exons 1-6                      |
| 1092248055 | <i>MSH2</i> | del exons 1-6                      |
| 1092248221 | <i>MSH2</i> | del exons 1-6                      |
| 1092248241 | <i>MSH2</i> | del exons 1-6                      |
| 1095079914 | <i>MSH2</i> | del exons 1-6                      |
| 1095216857 | <i>MSH2</i> | del exons 1-6                      |
| 1097149087 | <i>MSH2</i> | del exons 1-6                      |
| 1086153066 | <i>MSH2</i> | del exons 8-15                     |
| 1095188549 | <i>MSH2</i> | dup exon 6                         |
| 1092248133 | <i>MSH6</i> | c.10C>T (p.Gln4*)                  |
| 1095188551 | <i>MSH6</i> | c.10C>T (p.Gln4*)                  |
| 1086153366 | <i>MSH6</i> | c.1444C>T (p.Arg482*)              |
| 0159893462 | <i>MSH6</i> | c.1571dupA (p.Tyr524*)             |

|            |             |                                          |
|------------|-------------|------------------------------------------|
| 1097149067 | <i>MSH6</i> | c.1634_1635del<br>(p.Lys545Argfs*17)     |
| 0159893401 | <i>MSH6</i> | c.2057G>A (p.Gly686Asp)                  |
| 1097162715 | <i>MSH6</i> | c.220G>T (p.Gly74*)                      |
| 1095079885 | <i>MSH6</i> | c.2906_2907del<br>(p.Tyr969Leufs*5)      |
| 1093189924 | <i>MSH6</i> | c.3261del<br>(p.Phe1088Serfs*2)          |
| 0159893435 | <i>MSH6</i> | c.3439-2A>G                              |
| 1095112495 | <i>MSH6</i> | c.3439-2A>G                              |
| 1092247995 | <i>MSH6</i> | c.3516_3517del<br>(p.Arg1172Serfs*4)     |
| 1095112415 | <i>MSH6</i> | c.3647-1G>A                              |
| 1093190249 | <i>MSH6</i> | c.3699_3702del<br>(p.Lys1233Asnfs*6)     |
| 1097162643 | <i>MSH6</i> | c.3802-14_3809del                        |
| 1095112405 | <i>MSH6</i> | c.3934_3937dupGTTA<br>(p.Ile1313Serfs*7) |
| 1086153080 | <i>MSH6</i> | c.3939_3957dup<br>(p.Ala1320Serfs*5)     |
| 1092248186 | <i>MSH6</i> | c.3939_3957dup<br>(p.Ala1320Serfs*5)     |
| 1095112465 | <i>MSH6</i> | c.3939_3957dup<br>(p.Ala1320Serfs*5)     |
| 1095216873 | <i>MSH6</i> | c.3939_3957dup<br>(p.Ala1320Serfs*5)     |
| 1086153089 | <i>MSH6</i> | c.3959_3962del<br>(p.Ala1320Glufs*6)     |
| 1092248103 | <i>MSH6</i> | c.3959_3962del<br>(p.Ala1320Glufs*6)     |
| 1092248204 | <i>MSH6</i> | c.4001+1G>A                              |
| 0159657467 | <i>MSH6</i> | c.694C>T (p.Gln232*)                     |
| 1095112417 | <i>MSH6</i> | c.694C>T (p.Gln232*)                     |
| 1095079855 | <i>PMS2</i> | c.137G>T (p.Ser46Ile)                    |
| 1092248016 | <i>PMS2</i> | c.1831dupA<br>(p.Ile611Asnfs*2)          |
| 1092248177 | <i>PMS2</i> | c.1840A>T (p.Lys614*)                    |
| 1092248205 | <i>PMS2</i> | c.1840A>T (p.Lys614*)                    |

|            |              |                                        |                             |                                                       |
|------------|--------------|----------------------------------------|-----------------------------|-------------------------------------------------------|
| 1092248226 | <i>PMS2</i>  | c.1882C>T (p.Arg628*)                  |                             |                                                       |
| 1092248166 | <i>PMS2</i>  | c.1A>T (p.Met1?)                       |                             |                                                       |
| 1095112410 | <i>PMS2</i>  | c.214G>T (p.Gly72*)                    |                             |                                                       |
| 1092248021 | <i>PMS2</i>  | c.251-2A>T                             |                             |                                                       |
| 1097149076 | <i>PMS2</i>  | c.736_741delins11<br>(p.Pro246Cysfs*3) |                             |                                                       |
| 1095112490 | <i>PMS2</i>  | c.746_753del<br>(p.Asp249Valfs*2)      |                             |                                                       |
| 0159657458 | <i>PMS2</i>  | c.765C>A (p.Tyr255*)                   |                             |                                                       |
| 1093189907 | <i>PMS2</i>  | c.861_864del<br>(p.Arg287Serfs*19)     |                             |                                                       |
| 1092248136 | <i>PMS2</i>  | del exons 8-11                         |                             |                                                       |
| 1093189949 | <i>PMS2</i>  | del exons 9-10                         |                             |                                                       |
| 1095112488 | <i>EPCAM</i> | del exons 1-9                          |                             |                                                       |
| 1093189941 | <i>EPCAM</i> | del exons 2-9                          |                             |                                                       |
| 0159893426 | <i>EPCAM</i> | del exons 6-9                          |                             |                                                       |
| 0159893400 |              |                                        | <i>APC</i>                  | c.3927_3931del<br>(p.Glu1309Aspfs*4)                  |
| 1092248247 |              |                                        | <i>APC</i>                  | c.268A>T (p.Lys90*)                                   |
| 1093190205 |              |                                        | <i>APC</i>                  | c.531+5G>A                                            |
| 1095188522 |              |                                        | <i>APC</i>                  | c.70C>T (p.Arg24*)                                    |
| 1097162691 |              |                                        | <i>APC</i>                  | c.667C>T (p.Gln223*)                                  |
| 0159657480 |              |                                        | <i>MUTYH</i><br>(biallelic) | c.325C>T (p.Arg109Trp) AND<br>c.1187G>A (p.Gly396Asp) |
| 1095112444 |              |                                        | <i>MUTYH</i><br>(biallelic) | c.1187G>A (p.Gly396Asp)<br>homozygous                 |
| 1095216806 |              |                                        | <i>MUTYH</i><br>(biallelic) | c.1187G>A (p.Gly396Asp)<br>homozygous                 |
| 0159657488 |              |                                        | <i>BRCA1</i>                | del exon 21                                           |
| 0159893405 |              |                                        | <i>BRCA1</i>                | c.5266dupC<br>(p.Gln1756Profs*74)                     |
| 1092248015 |              |                                        | <i>BRCA1</i>                | c.5266dupC<br>(p.Gln1756Profs*74)                     |
| 1092248047 |              |                                        | <i>BRCA1</i>                | c.5066T>G (p.Met1689Arg)                              |

|            |              |                                       |
|------------|--------------|---------------------------------------|
| 1093189935 | <i>BRCA1</i> | c.5266dupC<br>(p.Gln1756Profs*74)     |
| 1093189938 | <i>BRCA1</i> | c.5096G>A (p.Arg1699Gln)              |
| 0159893382 | <i>BRCA2</i> | c.4647_4650del<br>(p.Lys1549Asnfs*18) |
| 1092248111 | <i>BRCA2</i> | c.9382C>T (p.Arg3128*)                |
| 1092248179 | <i>BRCA2</i> | c.5946del (p.Ser1982Argfs*22)         |
| 1093189918 | <i>BRCA2</i> | c.4631dupA (p.Asn1544Lysfs*4)         |
| 1093190286 | <i>BRCA2</i> | c.7008-2A>G                           |
| 1095079936 | <i>BRCA2</i> | c.846_847del<br>(p.Ile283Trpfs*11)    |
| 1095112479 | <i>BRCA2</i> | c.1296_1297del<br>(p.Asn433Glnfs*18)  |
| 1095216848 | <i>BRCA2</i> | c.2971_2983del<br>(p.Asn991Aspfs*3)   |
| 1097162706 | <i>BRCA2</i> | c.5946del (p.Ser1982Argfs*22)         |
| 1086153128 | <i>ATM</i>   | c.8371_8374del<br>(p.Tyr2791Glyfs*14) |
| 1092248032 | <i>ATM</i>   | c.1066-3_1072del                      |
| 1092248117 | <i>ATM</i>   | c.5414G>A (p.Trp1805*)                |
| 1093189919 | <i>ATM</i>   | c.1564_1565del<br>(p.Glu522Ilefs*43)  |
| 1095188583 | <i>ATM</i>   | c.8395_8404del<br>(p.Phe2799Lysfs*4)  |
| 1095214818 | <i>ATM</i>   | c.8824C>T (p.Gln2942*)                |
| 1095216856 | <i>ATM</i>   | c.7271T>G (p.Val2424Gly)              |
| 1097149023 | <i>ATM</i>   | c.6015dupC<br>(p.Glu2007Argfs*11)     |
| 1086153125 | <i>BARD1</i> | c.1690C>T (p.Gln564*)                 |
| 1092248067 | <i>BRIP1</i> | c.2392C>T (p.Arg798*)                 |
| 1093190284 | <i>BRIP1</i> | c.484C>T (p.Arg162*)                  |
| 1092247990 | <i>CHEK2</i> | c.444+1G>A                            |
| 1092248022 | <i>CHEK2</i> | c.1100del (p.Thr367Metfs*15)          |
| 1092248202 | <i>CHEK2</i> | c.444+1G>A                            |

|            |             |                                  |                               |                                                   |
|------------|-------------|----------------------------------|-------------------------------|---------------------------------------------------|
| 1093189977 |             |                                  | <i>CHEK2</i>                  | c.909-2A>G                                        |
| 1095112448 |             |                                  | <i>CHEK2</i>                  | c.1100del (p.Thr367Metfs*15)                      |
| 1092248056 |             |                                  | <i>NBN</i>                    | c.657_661del<br>(p.Lys219Asnfs*16)                |
| 1095079919 |             |                                  | <i>PALB2</i>                  | c.758dupT (p.Ser254Ilefs*3)                       |
| 1093190269 |             |                                  | <i>RAD51C</i>                 | c.890_899del (p.Leu297Hisfs*2)                    |
| 1093190213 | <i>MSH2</i> | c.1576del<br>(p.Thr526Profs*17)  | <i>ATM</i>                    | del exons 61-62                                   |
| 0159657434 | <i>MSH6</i> | c.3261dupC<br>(p.Phe1088Leufs*5) | <i>STK11</i>                  | c.375-1C>T                                        |
| 1092248195 | <i>MSH2</i> | del exons 1-6                    | <i>MUTYH</i><br>(monoallelic) | c.1187G>A (p.Gly396Asp)                           |
| 0159657427 |             |                                  | <i>MUTYH</i><br>(monoallelic) | c.1187G>A (p.Gly396Asp)                           |
| 0159657441 |             |                                  | <i>MUTYH</i><br>(monoallelic) | c.1187G>A (p.Gly396Asp)                           |
| 0159657473 |             |                                  | <i>MUTYH</i><br>(monoallelic) | c.1187G>A (p.Gly396Asp)                           |
| 0159893402 |             |                                  | <i>MUTYH</i><br>(monoallelic) | c.536A>G (p.Tyr179Cys),<br>c.494A>G (p.Tyr165Cys) |
| 0159893438 |             |                                  | <i>MUTYH</i><br>(monoallelic) | c.1187G>A (p.Gly396Asp)                           |
| 1092248023 |             |                                  | <i>MUTYH</i><br>(monoallelic) | c.1187G>A (p.Gly396Asp)                           |
| 1092248192 |             |                                  | <i>MUTYH</i><br>(monoallelic) | c.1187G>A (p.Gly396Asp)                           |
| 1092248228 |             |                                  | <i>MUTYH</i><br>(monoallelic) | c.1147del (p.Ala385Profs*23)                      |
| 1092248266 |             |                                  | <i>MUTYH</i><br>(monoallelic) | c.536A>G (p.Tyr179Cys)                            |
| 1093189965 |             |                                  | <i>MUTYH</i><br>(monoallelic) | c.1187G>A (p.Gly396Asp)                           |
| 1093189978 |             |                                  | <i>MUTYH</i><br>(monoallelic) | c.536A>G (p.Tyr179Cys)                            |
| 1093190192 |             |                                  | <i>MUTYH</i><br>(monoallelic) | c.1187G>A (p.Gly396Asp)                           |
| 1093190226 |             |                                  | <i>MUTYH</i><br>(monoallelic) | c.1187G>A (p.Gly396Asp)                           |
| 1095079872 |             |                                  | <i>MUTYH</i><br>(monoallelic) | c.1227_1228dupGG<br>(p.Glu410Glyfs*43)            |
| 1095079891 |             |                                  | <i>MUTYH</i><br>(monoallelic) | c.933+3A>C                                        |
| 1095079913 |             |                                  | <i>MUTYH</i><br>(monoallelic) | c.1187G>A (p.Gly396Asp)                           |
| 1095112413 |             |                                  | <i>MUTYH</i><br>(monoallelic) | c.1187G>A (p.Gly396Asp)                           |

|            |                               |                                        |
|------------|-------------------------------|----------------------------------------|
| 1095112432 | <i>MUTYH</i><br>(monoallelic) | c.1187G>A (p.Gly396Asp)                |
| 1095112475 | <i>MUTYH</i><br>(monoallelic) | c.1187G>A (p.Gly396Asp)                |
| 1095112499 | <i>MUTYH</i><br>(monoallelic) | c.1187G>A (p.Gly396Asp)                |
| 1095188584 | <i>MUTYH</i><br>(monoallelic) | c.1187G>A (p.Gly396Asp)                |
| 1095216832 | <i>MUTYH</i><br>(monoallelic) | c.1187G>A (p.Gly396Asp)                |
| 1095216898 | <i>MUTYH</i><br>(monoallelic) | c.536A>G (p.Tyr179Cys)                 |
| 1097149007 | <i>MUTYH</i><br>(monoallelic) | c.536A>G (p.Tyr179Cys)                 |
| 1097149020 | <i>MUTYH</i><br>(monoallelic) | c.734G>A (p.Arg245His)                 |
| 1097149054 | <i>MUTYH</i><br>(monoallelic) | c.1227_1228dupGG<br>(p.Glu410Glyfs*43) |

Supplemental Table 2: Germline variants of uncertain significance detected by a multigene hereditary cancer panel in 1260 individuals undergoing Lynch syndrome testing

| Subject ID | Gene          | HGVS alteration name     |
|------------|---------------|--------------------------|
| 0159657411 | <i>BMPR1A</i> | c.1327C>T (p.Arg443Cys)  |
| 0159657412 | <i>BRIP1</i>  | c.3293C>A (p.Ala1098Asp) |
| 0159657416 | <i>PALB2</i>  | c.2135C>T (p.Ala712Val)  |
| 0159657420 | <i>BARD1</i>  | c.1738G>A (p.Glu580Lys)  |
| 0159657423 | <i>BARD1</i>  | c.33G>T (p.Gln11His)     |
| 0159657425 | <i>ATM</i>    | c.7313C>T (p.Thr2438Ile) |
| 0159657425 | <i>ATM</i>    | c.334G>A (p.Ala112Thr)   |
| 0159657425 | <i>ATM</i>    | c.320G>A (p.Cys107Tyr)   |
| 0159657425 | <i>BARD1</i>  | c.1738G>A (p.Glu580Lys)  |
| 0159657425 | <i>CDH1</i>   | c.833-16C>G              |
| 0159657425 | <i>CDH1</i>   | c.595A>T (p.Thr199Ser)   |
| 0159657425 | <i>NBN</i>    | c.37+5G>A                |
| 0159657425 | <i>PTEN</i>   | c.802-51_802-14del       |
| 0159657425 | <i>RAD51D</i> | c.904-11T>A              |
| 0159657429 | <i>ATM</i>    | c.5675-10T>G             |
| 0159657429 | <i>CHEK2</i>  | c.1343T>G (p.Ile448Ser)  |
| 0159657429 | <i>NBN</i>    | c.1489A>G (p.Thr497Ala)  |
| 0159657430 | <i>NBN</i>    | c.1882G>A (p.Glu628Lys)  |
| 0159657432 | <i>TP53</i>   | c.139C>T (p.Pro47Ser)    |
| 0159657434 | <i>NBN</i>    | c.1690G>A (p.Glu564Lys)  |
| 0159657438 | <i>ATM</i>    | c.2289T>A (p.Phe763Leu)  |
| 0159657438 | <i>MSH6</i>   | c.972A>C (p.Lys324Asn)   |
| 0159657442 | <i>MLH1</i>   | c.479C>T (p.Ala160Val)   |
| 0159657448 | <i>BARD1</i>  | c.1242G>A (p.Met414Ile)  |
| 0159657450 | <i>BMPR1A</i> | c.1327C>T (p.Arg443Cys)  |
| 0159657451 | <i>MSH6</i>   | c.3257C>T (p.Pro1086Leu) |
| 0159657454 | <i>RAD51C</i> | c.376G>A (p.Ala126Thr)   |
| 0159657455 | <i>MLH1</i>   | c.-42C>T                 |
| 0159657456 | <i>ATM</i>    | c.4388T>G (p.Phe1463Cys) |
| 0159657456 | <i>ATM</i>    | c.1810C>T (p.Pro604Ser)  |
| 0159657457 | <i>MSH6</i>   | c.743G>C (p.Arg248Pro)   |
| 0159657459 | <i>SMAD4</i>  | c.586A>G (p.Ser196Gly)   |
| 0159657460 | <i>PMS2</i>   | c.595C>T (p.Arg199Cys)   |
| 0159657460 | <i>RAD51D</i> | c.973G>A (p.Gly325Ser)   |
| 0159657462 | <i>ATM</i>    | c.2096A>G (p.Glu699Gly)  |
| 0159657462 | <i>NBN</i>    | c.797C>T (p.Pro266Leu)   |
| 0159657462 | <i>PTEN</i>   | c.802-51_802-14del       |
| 0159657462 | <i>RAD51D</i> | c.695G>A (p.Arg232Gln)   |
| 0159657467 | <i>MSH6</i>   | c.1180T>G (p.Ser394Ala)  |
| 0159657469 | <i>NBN</i>    | c.1489A>G (p.Thr497Ala)  |
| 0159657470 | <i>PMS2</i>   | c.1715C>T (p.Ala572Val)  |
| 0159657470 | <i>RAD51C</i> | c.706-13C>G              |
| 0159657473 | <i>ATM</i>    | c.1229T>C (p.Val410Ala)  |
| 0159657474 | <i>APC</i>    | c.6639G>A (p.Met2213Ile) |
| 0159657475 | <i>MUTYH</i>  | c.998-9C>T               |
| 0159657476 | <i>ATM</i>    | c.6067G>A (p.Gly2023Arg) |
| 0159657483 | <i>ATM</i>    | c.8915A>G (p.Gln2972Arg) |

|            |                        |                               |
|------------|------------------------|-------------------------------|
| 0159657485 | <i>RAD51C</i>          | c.146-8A>G                    |
| 0159657487 | <i>CDH1</i>            | c.2413G>A (p.Asp805Asn)       |
| 0159657487 | <i>PMS2</i>            | c.2350G>A (p.Asp784Asn)       |
| 0159657488 | <i>MSH2</i>            | c.1480T>C (p.Ser494Pro)       |
| 0159657491 | <i>APC</i>             | c.1825G>A (p.Val609Ile)       |
| 0159657494 | <i>MLH1</i>            | c.1942C>T (p.Pro648Ser)       |
| 0159657496 | <i>BRIP1</i>           | c.1198G>T (p.Asp400Tyr)       |
| 0159657497 | <i>PALB2</i>           | c.2606C>T (p.Ser869Phe)       |
| 0159657501 | <i>CDKN2A (P16)</i>    | c.430C>T (p.Arg144Cys)        |
| 0159657503 | <i>PMS2</i>            | c.1864A>G (p.Met622Val)       |
| 0159893377 | <i>ATM</i>             | c.5071A>C (p.Ser1691Arg)      |
| 0159893378 | <i>ATM</i>             | c.1229T>C (p.Val410Ala)       |
| 0159893378 | <i>MSH6</i>            | c.3854T>C (p.Phe1285Ser)      |
| 0159893381 | <i>ATM</i>             | c.6995T>C (p.Leu2332Pro)      |
| 0159893381 | <i>CDH1</i>            | c.833-16C>G                   |
| 0159893382 | <i>ATM</i>             | c.6095G>A (p.Arg2032Lys)      |
| 0159893384 | <i>ATM</i>             | c.3175G>A (p.Ala1059Thr)      |
| 0159893386 | <i>APC</i>             | c.6724A>G (p.Ser2242Gly)      |
| 0159893395 | <i>BMPR1A</i>          | c.1327C>T (p.Arg443Cys)       |
| 0159893397 | <i>CDKN2A (P14ARF)</i> | dup exons 1-2                 |
| 0159893397 | <i>CDKN2A (P16)</i>    | dup exons 1-3                 |
| 0159893399 | <i>MSH6</i>            | c.3961A>G (p.Arg1321Gly)      |
| 0159893401 | <i>TP53</i>            | c.704A>G (p.Asn235Ser)        |
| 0159893402 | <i>APC</i>             | c.5528C>T (p.Pro1843Leu)      |
| 0159893403 | <i>ATM</i>             | c.1229T>C (p.Val410Ala)       |
| 0159893403 | <i>ATM</i>             | c.5612C>T (p.Thr1871Ile)      |
| 0159893403 | <i>CHEK2</i>           | c.470T>C (p.Ile157Thr)        |
| 0159893404 | <i>PTEN</i>            | c.802-51_802-14del            |
| 0159893404 | <i>PTEN</i>            | c.1061C>A (p.Pro354Gln)       |
| 0159893408 | <i>MSH2</i>            | c.174C>G (p.Phe58Leu)         |
| 0159893416 | <i>CHEK2</i>           | c.751A>T (p.Ile251Phe)        |
| 0159893416 | <i>PALB2</i>           | c.1696C>T (p.Arg566Cys)       |
| 0159893417 | <i>MSH6</i>            | c.1474_1476del (p.Met492del)  |
| 0159893421 | <i>CDKN2A (P16)</i>    | c.-33G>C                      |
| 0159893424 | <i>CDH1</i>            | c.1603A>T (p.Ile535Phe)       |
| 0159893427 | <i>BRIP1</i>           | c.2220G>T (p.Gln740His)       |
| 0159893428 | <i>APC</i>             | c.4919G>A (p.Arg1640Gln)      |
| 0159893429 | <i>BARD1</i>           | c.1738G>A (p.Glu580Lys)       |
| 0159893429 | <i>CDH1</i>            | c.833-16C>G                   |
| 0159893430 | <i>BARD1</i>           | c.2282G>A (p.Ser761Asn)       |
| 0159893430 | <i>MSH2</i>            | c.1847C>G (p.Pro616Arg)       |
| 0159893432 | <i>NBN</i>             | c.683T>G (p.Ile228Arg)        |
| 0159893433 | <i>TP53</i>            | c.665C>T (p.Pro222Leu)        |
| 0159893434 | <i>BRCA1</i>           | c.3535A>C (p.Lys1179Gln)      |
| 0159893436 | <i>APC</i>             | c.2993G>T (p.Gly998Val)       |
| 0159893438 | <i>ATM</i>             | c.7122A>C (p.Glu2374Asp)      |
| 0159893439 | <i>ATM</i>             | c.544G>C (p.Val182Leu)        |
| 0159893439 | <i>NBN</i>             | c.1882G>A (p.Glu628Lys)       |
| 0159893441 | <i>APC</i>             | c.4711_4713del (p.Asp1571del) |
| 0159893444 | <i>CDKN2A (P16)</i>    | c.361C>G (p.Leu121Val)        |

|            |                        |                                  |
|------------|------------------------|----------------------------------|
| 0159893444 | <i>PTEN</i>            | c.802-51_802-14del               |
| 0159893445 | <i>APC</i>             | c.6363_6365dupTGC (p.Ala2122dup) |
| 0159893445 | <i>CDK4</i>            | c.431A>G (p.Glu144Gly)           |
| 0159893445 | <i>CDKN2A (P16)</i>    | c.150+6T>C                       |
| 0159893446 | <i>CDK4</i>            | c.460G>C (p.Val154Leu)           |
| 0159893450 | <i>CDH1</i>            | c.2494G>A (p.Val832Met)          |
| 0159893450 | <i>TP53</i>            | c.31G>C (p.Glu11Gln)             |
| 0159893451 | <i>MSH6</i>            | c.1402C>T (p.Arg468Cys)          |
| 0159893453 | <i>TP53</i>            | c.97-6C>T                        |
| 0159893457 | <i>BMPR1A</i>          | c.1513G>A (p.Ala505Thr)          |
| 0159893458 | <i>CDH1</i>            | c.1888C>G (p.Leu630Val)          |
| 0159893458 | <i>NBN</i>             | c.1690G>A (p.Glu564Lys)          |
| 0159893464 | <i>SMAD4</i>           | c.1573A>G (p.Ile525Val)          |
| 0159893467 | <i>ATM</i>             | c.2608A>G (p.Asn870Asp)          |
| 1086153037 | <i>MUTYH</i>           | c.724G>T (p.Val242Leu)           |
| 1086153040 | <i>BRCA2</i>           | dup exons 23-24                  |
| 1086153055 | <i>BARD1</i>           | c.1738G>A (p.Glu580Lys)          |
| 1086153055 | <i>PMS2</i>            | c.847A>C (p.Ser283Arg)           |
| 1086153058 | <i>RAD51C</i>          | c.506T>C (p.Val169Ala)           |
| 1086153058 | <i>SMAD4</i>           | c.542C>G (p.Thr181Ser)           |
| 1086153059 | <i>ATM</i>             | c.6067G>A (p.Gly2023Arg)         |
| 1086153060 | <i>BARD1</i>           | c.1795G>A (p.Glu599Lys)          |
| 1086153062 | <i>BMPR1A</i>          | c.1066C>T (p.Pro356Ser)          |
| 1086153066 | <i>ATM</i>             | c.1229T>C (p.Val410Ala)          |
| 1086153066 | <i>ATM</i>             | c.4066A>G (p.Asn1356Asp)         |
| 1086153075 | <i>APC</i>             | c.6637A>G (p.Met2213Val)         |
| 1086153076 | <i>MUTYH</i>           | c.998-18G>A                      |
| 1086153076 | <i>PMS2</i>            | c.1717A>T (p.Thr573Ser)          |
| 1086153078 | <i>PMS2</i>            | c.1723A>G (p.Asn575Asp)          |
| 1086153078 | <i>PMS2</i>            | c.2386G>A (p.Val796Ile)          |
| 1086153086 | <i>BRCA2</i>           | c.898G>A (p.Val300Ile)           |
| 1086153092 | <i>CDKN2A (P16)</i>    | c.434T>C (p.Ile145Thr)           |
| 1086153100 | <i>CDKN2A (P14ARF)</i> | c.217A>C (p.Ser73Arg)            |
| 1086153101 | <i>ATM</i>             | c.5821G>C (p.Val1941Leu)         |
| 1086153106 | <i>APC</i>             | c.1481G>A (p.Ser494Asn)          |
| 1086153106 | <i>MSH6</i>            | c.3284G>A (p.Arg1095His)         |
| 1086153107 | <i>BARD1</i>           | c.26_40del (p.Asn9_Arg13del)     |
| 1086153108 | <i>ATM</i>             | c.8228C>T (p.Thr2743Met)         |
| 1086153108 | <i>CHEK2</i>           | c.470T>C (p.Ile157Thr)           |
| 1086153112 | <i>MSH6</i>            | c.1858G>A (p.Gly620Ser)          |
| 1086153112 | <i>MUTYH</i>           | c.1508G>A (p.Gly503Glu)          |
| 1086153113 | <i>BARD1</i>           | c.2008A>G (p.Lys670Glu)          |
| 1086153113 | <i>BRCA1</i>           | c.2522G>C (p.Arg841Pro)          |
| 1086153114 | <i>CHEK2</i>           | c.428A>G (p.His143Arg)           |
| 1086153116 | <i>CHEK2</i>           | c.538C>T (p.Arg180Cys)           |
| 1086153122 | <i>ATM</i>             | c.544G>C (p.Val182Leu)           |
| 1086153122 | <i>PMS2</i>            | c.123_131del (p.Leu42_Glu44del)  |
| 1086153130 | <i>MUTYH</i>           | c.1518+5G>A                      |
| 1086153131 | <i>SMAD4</i>           | c.788-1G>C                       |
| 1086153325 | <i>CDKN2A (P16)</i>    | c.-33G>C                         |

|            |                        |                          |
|------------|------------------------|--------------------------|
| 1086153332 | <i>MLH1</i>            | c.52C>T (p.Arg18Cys)     |
| 1086153345 | <i>STK11</i>           | c.1193C>T (p.Ala398Val)  |
| 1086153348 | <i>ATM</i>             | c.8965C>G (p.Gln2989Glu) |
| 1086153353 | <i>APC</i>             | c.3511C>T (p.Arg1171Cys) |
| 1086153356 | <i>RAD51C</i>          | c.376G>A (p.Ala126Thr)   |
| 1086153363 | <i>NBN</i>             | c.797C>T (p.Pro266Leu)   |
| 1086153363 | <i>TP53</i>            | c.139C>T (p.Pro47Ser)    |
| 1086153365 | <i>ATM</i>             | c.290T>C (p.Ile97Thr)    |
| 1086153365 | <i>BRIP1</i>           | c.2236A>G (p.Ile746Val)  |
| 1086153365 | <i>NBN</i>             | c.797C>T (p.Pro266Leu)   |
| 1086153365 | <i>RAD51C</i>          | c.922G>T (p.Ala308Ser)   |
| 1086153365 | <i>STK11</i>           | c.894C>A (p.Phe298Leu)   |
| 1086153375 | <i>CDKN2A (P14ARF)</i> | c.361G>A (p.Ala121Thr)   |
| 1086153375 | <i>PALB2</i>           | c.94C>G (p.Leu32Val)     |
| 1086153376 | <i>MLH1</i>            | c.144A>C (p.Gln48His)    |
| 1086153376 | <i>TP53</i>            | c.139C>T (p.Pro47Ser)    |
| 1086153377 | <i>ATM</i>             | c.6315G>C (p.Arg2105Ser) |
| 1086153399 | <i>ATM</i>             | c.6995T>C (p.Leu2332Pro) |
| 1086153399 | <i>BARD1</i>           | c.620A>G (p.Lys207Arg)   |
| 1086153399 | <i>NBN</i>             | c.505C>T (p.Arg169Cys)   |
| 1086153399 | <i>SMAD4</i>           | c.880A>G (p.Met294Val)   |
| 1086153399 | <i>TP53</i>            | c.97-6C>T                |
| 1086153401 | <i>RAD51C</i>          | c.376G>A (p.Ala126Thr)   |
| 1086153404 | <i>BRCA2</i>           | c.292T>G (p.Leu98Val)    |
| 1086153404 | <i>RAD51C</i>          | c.211A>T (p.Asn71Tyr)    |
| 1086153414 | <i>ATM</i>             | c.1229T>C (p.Val410Ala)  |
| 1086153418 | <i>ATM</i>             | c.5071A>C (p.Ser1691Arg) |
| 1086153418 | <i>MSH6</i>            | c.3226C>G (p.Arg1076Gly) |
| 1092247687 | <i>CHEK2</i>           | c.1343T>G (p.Ile448Ser)  |
| 1092247989 | <i>MSH2</i>            | c.2006G>A (p.Gly669Asp)  |
| 1092247992 | <i>BARD1</i>           | c.1569-13C>G             |
| 1092247997 | <i>BARD1</i>           | c.1347A>G (p.Gln449Gln)  |
| 1092247998 | <i>ATM</i>             | c.3925G>A (p.Ala1309Thr) |
| 1092248000 | <i>BMPR1A</i>          | c.1327C>T (p.Arg443Cys)  |
| 1092248002 | <i>ATM</i>             | c.6919C>T (p.Leu2307Phe) |
| 1092248002 | <i>ATM</i>             | c.1744T>C (p.Phe582Leu)  |
| 1092248002 | <i>BMPR1A</i>          | c.1243G>A (p.Glu415Lys)  |
| 1092248002 | <i>BRCA2</i>           | c.7444A>G (p.Thr2482Ala) |
| 1092248004 | <i>CDH1</i>            | c.670C>T (p.Arg224Cys)   |
| 1092248004 | <i>CDH1</i>            | c.2440-6C>G              |
| 1092248004 | <i>MSH2</i>            | c.499G>C (p.Asp167His)   |
| 1092248005 | <i>APC</i>             | c.5635G>T (p.Ala1879Ser) |
| 1092248006 | <i>PTEN</i>            | c.892C>G (p.Gln298Glu)   |
| 1092248007 | <i>APC</i>             | c.1606G>A (p.Glu536Lys)  |
| 1092248007 | <i>NBN</i>             | c.797C>T (p.Pro266Leu)   |
| 1092248007 | <i>RAD51D</i>          | c.983C>T (p.Thr328Ile)   |
| 1092248008 | <i>BRIP1</i>           | c.2372A>G (p.Asp791Gly)  |
| 1092248008 | <i>CDK4</i>            | c.779T>A (p.Val260Glu)   |
| 1092248010 | <i>ATM</i>             | c.544G>C (p.Val182Leu)   |
| 1092248012 | <i>APC</i>             | c.6679G>T (p.Gly2227Cys) |

|            |                     |                                                     |
|------------|---------------------|-----------------------------------------------------|
| 1092248012 | <i>BRIP1</i>        | c.890A>G (p.Lys297Arg)                              |
| 1092248022 | <i>CDH1</i>         | c.2440-6C>G                                         |
| 1092248024 | <i>RAD51D</i>       | c.904-3C>T                                          |
| 1092248025 | <i>RAD51C</i>       | c.376G>A (p.Ala126Thr)                              |
| 1092248031 | <i>CDKN2A (P16)</i> | c.170C>T (p.Ala57Val)                               |
| 1092248031 | <i>MSH6</i>         | c.3930G>C (p.Glu1310Asp)                            |
| 1092248034 | <i>NBN</i>          | c.278C>T (p.Ser93Leu)                               |
| 1092248043 | <i>PALB2</i>        | c.1846G>C (p.Asp616His)                             |
| 1092248044 | <i>PMS2</i>         | c.1717A>T (p.Thr573Ser)                             |
| 1092248044 | <i>PMS2</i>         | c.1714G>A (p.Ala572Thr)                             |
| 1092248045 | <i>CDH1</i>         | c.1888C>G (p.Leu630Val)                             |
| 1092248045 | <i>PALB2</i>        | c.3035C>T (p.Thr1012Ile)                            |
| 1092248045 | <i>PALB2</i>        | c.1273G>A (p.Val425Met)                             |
| 1092248045 | <i>RAD51C</i>       | c.635G>A (p.Arg212His)                              |
| 1092248047 | <i>MSH2</i>         | c.1697_1709delinsTTCT (p.Asn566_Tyr570delinsIleLeu) |
| 1092248048 | <i>ATM</i>          | c.7187C>G (p.Thr2396Ser)                            |
| 1092248054 | <i>BRCA2</i>        | c.8222A>G (p.Lys2741Arg)                            |
| 1092248060 | <i>CHEK2</i>        | c.470T>C (p.Ile157Thr)                              |
| 1092248061 | <i>ATM</i>          | c.4709T>C (p.Val1570Ala)                            |
| 1092248065 | <i>RAD51C</i>       | c.790G>A (p.Gly264Ser)                              |
| 1092248068 | <i>APC</i>          | c.6679G>T (p.Gly2227Cys)                            |
| 1092248068 | <i>NBN</i>          | c.321-17C>G                                         |
| 1092248069 | <i>STK11</i>        | c.1211C>T (p.Ser404Phe)                             |
| 1092248070 | <i>MSH6</i>         | c.3299C>T (p.Thr1100Met)                            |
| 1092248072 | <i>PALB2</i>        | c.2135C>T (p.Ala712Val)                             |
| 1092248074 | <i>ATM</i>          | c.1810C>T (p.Pro604Ser)                             |
| 1092248076 | <i>CDKN2A (P16)</i> | c.-2G>A                                             |
| 1092248077 | <i>BRIP1</i>        | c.584T>C (p.Leu195Pro)                              |
| 1092248080 | <i>BRCA2</i>        | c.6158C>A (p.Ser2053Tyr)                            |
| 1092248082 | <i>ATM</i>          | c.8228C>T (p.Thr2743Met)                            |
| 1092248082 | <i>MUTYH</i>        | c.700G>A (p.Val234Met)                              |
| 1092248084 | <i>ATM</i>          | c.4375G>A (p.Gly1459Arg)                            |
| 1092248085 | <i>CDK4</i>         | c.684-4A>T                                          |
| 1092248086 | <i>APC</i>          | c.4332A>T (p.Gln1444His)                            |
| 1092248086 | <i>CDH1</i>         | c.88C>A (p.Pro30Thr)                                |
| 1092248087 | <i>RAD51C</i>       | c.790G>A (p.Gly264Ser)                              |
| 1092248088 | <i>SMAD4</i>        | c.554C>A (p.Pro185Gln)                              |
| 1092248091 | <i>CDK4</i>         | c.155G>A (p.Ser52Asn)                               |
| 1092248097 | <i>STK11</i>        | c.1211C>T (p.Ser404Phe)                             |
| 1092248099 | <i>ATM</i>          | c.5071A>C (p.Ser1691Arg)                            |
| 1092248101 | <i>APC</i>          | c.1391A>G (p.His464Arg)                             |
| 1092248102 | <i>BARD1</i>        | c.2306C>T (p.Ser769Phe)                             |
| 1092248102 | <i>PMS2</i>         | c.58C>T (p.Arg20Trp)                                |
| 1092248103 | <i>CDH1</i>         | c.2440-6C>G                                         |
| 1092248115 | <i>ATM</i>          | c.5071A>C (p.Ser1691Arg)                            |
| 1092248115 | <i>NBN</i>          | c.511A>G (p.Ile171Val)                              |
| 1092248117 | <i>APC</i>          | c.7797A>C (p.Lys2599Asn)                            |
| 1092248119 | <i>ATM</i>          | c.8147T>C (p.Val2716Ala)                            |
| 1092248125 | <i>ATM</i>          | c.280A>G (p.Met94Val)                               |
| 1092248127 | <i>STK11</i>        | c.970C>G (p.Pro324Ala)                              |

|            |                     |                          |
|------------|---------------------|--------------------------|
| 1092248130 | <i>CDH1</i>         | c.2635G>A (p.Gly879Ser)  |
| 1092248130 | <i>PMS2</i>         | c.614A>C (p.Gln205Pro)   |
| 1092248131 | <i>CHEK2</i>        | c.1567C>T (p.Arg523Cys)  |
| 1092248134 | <i>APC</i>          | c.3299C>T (p.Ser1100Phe) |
| 1092248135 | <i>CHEK2</i>        | c.410G>A (p.Arg137Gln)   |
| 1092248138 | <i>NBN</i>          | c.1882G>A (p.Glu628Lys)  |
| 1092248140 | <i>MUTYH</i>        | c.985G>A (p.Val329Met)   |
| 1092248146 | <i>SMAD4</i>        | c.-3C>G                  |
| 1092248148 | <i>NBN</i>          | c.-2C>A                  |
| 1092248149 | <i>CHEK2</i>        | c.14C>T (p.Ser5Leu)      |
| 1092248151 | <i>ATM</i>          | c.6860G>C (p.Gly2287Ala) |
| 1092248159 | <i>NBN</i>          | c.1262T>C (p.Leu421Ser)  |
| 1092248162 | <i>BRIP1</i>        | c.2220G>T (p.Gln740His)  |
| 1092248164 | <i>BRIP1</i>        | c.584T>C (p.Leu195Pro)   |
| 1092248167 | <i>CDKN2A (P16)</i> | c.-25C>T                 |
| 1092248181 | <i>ATM</i>          | c.1810C>T (p.Pro604Ser)  |
| 1092248181 | <i>BMPR1A</i>       | c.1235T>C (p.Val412Ala)  |
| 1092248181 | <i>CDKN2A (P16)</i> | c.-25C>T                 |
| 1092248183 | <i>NBN</i>          | c.1882G>A (p.Glu628Lys)  |
| 1092248184 | <i>BRIP1</i>        | c.584T>C (p.Leu195Pro)   |
| 1092248184 | <i>CHEK2</i>        | c.593-20_593-18del       |
| 1092248185 | <i>NBN</i>          | c.1489A>G (p.Thr497Ala)  |
| 1092248185 | <i>PALB2</i>        | c.100C>T (p.Arg34Cys)    |
| 1092248185 | <i>PTEN</i>         | c.802-51_802-14del       |
| 1092248192 | <i>MSH2</i>         | c.167A>T (p.Glu56Val)    |
| 1092248193 | <i>ATM</i>          | c.7475T>G (p.Leu2492Arg) |
| 1092248197 | <i>ATM</i>          | c.1229T>C (p.Val410Ala)  |
| 1092248197 | <i>BRIP1</i>        | c.584T>C (p.Leu195Pro)   |
| 1092248198 | <i>MLH1</i>         | c.1709A>G (p.Asn570Ser)  |
| 1092248205 | <i>NBN</i>          | c.1035C>T (p.Gly345Gly)  |
| 1092248206 | <i>BRCA2</i>        | c.8990A>G (p.Tyr2997Cys) |
| 1092248206 | <i>NBN</i>          | c.797C>T (p.Pro266Leu)   |
| 1092248206 | <i>PMS2</i>         | c.497T>C (p.Leu166Pro)   |
| 1092248217 | <i>STK11</i>        | c.721G>A (p.Ala241Thr)   |
| 1092248223 | <i>ATM</i>          | c.5071A>C (p.Ser1691Arg) |
| 1092248225 | <i>APC</i>          | c.5690A>C (p.His1897Pro) |
| 1092248225 | <i>BRIP1</i>        | c.1433A>G (p.His478Arg)  |
| 1092248227 | <i>BRIP1</i>        | c.2236A>G (p.Ile746Val)  |
| 1092248234 | <i>BMPR1A</i>       | c.749T>C (p.Met250Thr)   |
| 1092248238 | <i>NBN</i>          | c.613A>G (p.Ile205Val)   |
| 1092248239 | <i>PALB2</i>        | c.2816T>G (p.Leu939Trp)  |
| 1092248246 | <i>NBN</i>          | c.1354A>C (p.Thr452Pro)  |
| 1092248246 | <i>PTEN</i>         | c.802-51_802-14del       |
| 1092248251 | <i>SMAD4</i>        | c.455-6A>G               |
| 1092248252 | <i>ATM</i>          | c.496+4T>C               |
| 1092248255 | <i>CHEK2</i>        | c.853A>T (p.Ile285Phe)   |
| 1092248263 | <i>ATM</i>          | c.3925G>A (p.Ala1309Thr) |
| 1092248265 | <i>BRIP1</i>        | c.1444A>G (p.Ile482Val)  |
| 1092248267 | <i>ATM</i>          | c.1810C>T (p.Pro604Ser)  |
| 1092248267 | <i>ATM</i>          | c.2494C>T (p.Arg832Cys)  |

|            |                     |                                          |
|------------|---------------------|------------------------------------------|
| 1092248268 | <i>MLH1</i>         | c.1565G>A (p.Arg522Gln)                  |
| 1092248269 | <i>BRCA2</i>        | c.5537T>C (p.Ile1846Thr)                 |
| 1092248270 | <i>ATM</i>          | c.544G>C (p.Val182Leu)                   |
| 1092248270 | <i>NBN</i>          | c.797C>T (p.Pro266Leu)                   |
| 1092248272 | <i>RAD51D</i>       | c.29C>T (p.Pro10Leu)                     |
| 1093187329 | <i>PALB2</i>        | c.94C>G (p.Leu32Val)                     |
| 1093187353 | <i>CDKN2A (P16)</i> | c.430C>T (p.Arg144Cys)                   |
| 1093187353 | <i>PMS2</i>         | c.1211C>G (p.Pro404Arg)                  |
| 1093189904 | <i>RAD51D</i>       | c.695G>A (p.Arg232Gln)                   |
| 1093189905 | <i>CHEK2</i>        | c.538C>T (p.Arg180Cys)                   |
| 1093189909 | <i>ATM</i>          | c.6067G>A (p.Gly2023Arg)                 |
| 1093189909 | <i>CDH1</i>         | c.2590G>A (p.Glu864Lys)                  |
| 1093189910 | <i>CDH1</i>         | c.1223C>T (p.Ala408Val)                  |
| 1093189911 | <i>MSH6</i>         | dup exon 8                               |
| 1093189912 | <i>MSH6</i>         | dup exon 8                               |
| 1093189917 | <i>CHEK2</i>        | c.1091T>C (p.Ile364Thr)                  |
| 1093189917 | <i>MLH1</i>         | c.482C>T (p.Thr161Met)                   |
| 1093189917 | <i>MSH6</i>         | c.3802-19_3802-16dupAATA                 |
| 1093189922 | <i>ATM</i>          | c.544G>C (p.Val182Leu)                   |
| 1093189922 | <i>MUTYH</i>        | c.1301C>T (p.Thr434Met)                  |
| 1093189923 | <i>BRIP1</i>        | c.338C>T (p.Thr113Ile)                   |
| 1093189923 | <i>CDKN2A (P16)</i> | c.-33G>C                                 |
| 1093189924 | <i>CDKN2A (P16)</i> | c.430C>T (p.Arg144Cys)                   |
| 1093189924 | <i>NBN</i>          | c.1489A>G (p.Thr497Ala)                  |
| 1093189926 | <i>BRIP1</i>        | c.3411_3412delinsCT (p.Asp1138delinsTyr) |
| 1093189926 | <i>CDKN2A (P16)</i> | c.430C>T (p.Arg144Cys)                   |
| 1093189933 | <i>ATM</i>          | c.3154-4G>A                              |
| 1093189934 | <i>CDH1</i>         | c.2440-6C>G                              |
| 1093189934 | <i>CDKN2A (P16)</i> | c.-25C>T                                 |
| 1093189939 | <i>BRCA2</i>        | c.6109G>A (p.Glu2037Lys)                 |
| 1093189939 | <i>BRIP1</i>        | c.1684A>G (p.Ile562Val)                  |
| 1093189939 | <i>SMAD4</i>        | c.424+5G>A                               |
| 1093189940 | <i>APC</i>          | c.4336G>A (p.Ala1446Thr)                 |
| 1093189945 | <i>ATM</i>          | c.6919C>T (p.Leu2307Phe)                 |
| 1093189946 | <i>ATM</i>          | c.544G>C (p.Val182Leu)                   |
| 1093189950 | <i>APC</i>          | c.4364A>G (p.Asn1455Ser)                 |
| 1093189950 | <i>MLH1</i>         | c.83C>T (p.Pro28Leu)                     |
| 1093189951 | <i>ATM</i>          | c.6572+4T>C                              |
| 1093189951 | <i>STK11</i>        | c.-1C>T                                  |
| 1093189956 | <i>ATM</i>          | c.6995T>C (p.Leu2332Pro)                 |
| 1093189962 | <i>CDKN2A (P16)</i> | c.170C>G (p.Ala57Gly)                    |
| 1093189962 | <i>CHEK2</i>        | c.922-1G>A                               |
| 1093189966 | <i>CDK4</i>         | c.122A>G (p.Asn41Ser)                    |
| 1093189967 | <i>ATM</i>          | c.4388T>G (p.Phe1463Cys)                 |
| 1093189967 | <i>ATM</i>          | c.1810C>T (p.Pro604Ser)                  |
| 1093189970 | <i>APC</i>          | c.854A>G (p.Asp285Gly)                   |
| 1093189971 | <i>BRIP1</i>        | c.728T>C (p.Ile243Thr)                   |
| 1093189971 | <i>MLH1</i>         | c.53G>C (p.Arg18Pro)                     |
| 1093189974 | <i>APC</i>          | c.5424_5426del (p.Asn1808del)            |
| 1093189974 | <i>CDKN2A (P16)</i> | c.-33G>C                                 |

|            |                     |                                 |
|------------|---------------------|---------------------------------|
| 1093189976 | <i>PMS2</i>         | c.1268C>G (p.Ala423Gly)         |
| 1093189977 | <i>BRIP1</i>        | c.584T>C (p.Leu195Pro)          |
| 1093189981 | <i>ATM</i>          | c.2401G>A (p.Gly801Ser)         |
| 1093189986 | <i>ATM</i>          | c.4424A>G (p.Tyr1475Cys)        |
| 1093189992 | <i>RAD51C</i>       | c.376G>A (p.Ala126Thr)          |
| 1093189994 | <i>ATM</i>          | c.6114C>G (p.His2038Gln)        |
| 1093189997 | <i>BRIP1</i>        | c.2564G>A (p.Arg855His)         |
| 1093189999 | <i>ATM</i>          | c.1073A>G (p.Asn358Ser)         |
| 1093189999 | <i>ATM</i>          | c.186-7C>T                      |
| 1093189999 | <i>BRIP1</i>        | c.413T>C (p.Leu138Ser)          |
| 1093189999 | <i>NBN</i>          | c.797C>T (p.Pro266Leu)          |
| 1093189999 | <i>NBN</i>          | c.37+5G>A                       |
| 1093189999 | <i>PTEN</i>         | c.-7C>T                         |
| 1093189999 | <i>RAD51D</i>       | c.695G>A (p.Arg232Gln)          |
| 1093190193 | <i>BMPR1A</i>       | c.1420G>C (p.Val474Leu)         |
| 1093190196 | <i>BRCA2</i>        | dup exons 23-24                 |
| 1093190197 | <i>CDH1</i>         | c.833-16C>G                     |
| 1093190197 | <i>NBN</i>          | c.797C>T (p.Pro266Leu)          |
| 1093190201 | <i>APC</i>          | c.2258A>T (p.His753Leu)         |
| 1093190201 | <i>CHEK2</i>        | c.246_260del (p.Asp82_Glu86del) |
| 1093190203 | <i>ATM</i>          | c.544G>C (p.Val182Leu)          |
| 1093190203 | <i>CDKN2A (P16)</i> | c.430C>T (p.Arg144Cys)          |
| 1093190203 | <i>NBN</i>          | c.2146A>G (p.Asn716Asp)         |
| 1093190205 | <i>CHEK2</i>        | c.470T>C (p.Ile157Thr)          |
| 1093190206 | <i>ATM</i>          | c.4375G>A (p.Gly1459Arg)        |
| 1093190211 | <i>APC</i>          | c.7468G>A (p.Asp2490Asn)        |
| 1093190211 | <i>BRIP1</i>        | c.3444C>A (p.Asp1148Glu)        |
| 1093190213 | <i>ATM</i>          | c.2396C>T (p.Ala799Val)         |
| 1093190220 | <i>BARD1</i>        | c.841C>T (p.Pro281Ser)          |
| 1093190223 | <i>STK11</i>        | dup exons 1-9                   |
| 1093190228 | <i>ATM</i>          | c.370A>G (p.Ile124Val)          |
| 1093190228 | <i>NBN</i>          | c.1317A>G (p.Ile439Met)         |
| 1093190230 | <i>ATM</i>          | c.6067G>A (p.Gly2023Arg)        |
| 1093190232 | <i>ATM</i>          | c.6974C>T (p.Ala2325Val)        |
| 1093190232 | <i>CHEK2</i>        | c.1420C>T (p.Arg474Cys)         |
| 1093190232 | <i>CHEK2</i>        | c.1260-8A>T                     |
| 1093190232 | <i>CHEK2</i>        | c.1333T>C (p.Tyr445His)         |
| 1093190232 | <i>CHEK2</i>        | c.1525C>T (p.Pro509Ser)         |
| 1093190232 | <i>CHEK2</i>        | c.1348G>A (p.Glu450Lys)         |
| 1093190232 | <i>MLH1</i>         | c.52C>T (p.Arg18Cys)            |
| 1093190232 | <i>RAD51D</i>       | c.577-13C>A                     |
| 1093190234 | <i>ATM</i>          | c.6067G>A (p.Gly2023Arg)        |
| 1093190239 | <i>BARD1</i>        | c.1738G>A (p.Glu580Lys)         |
| 1093190245 | <i>BRCA2</i>        | c.6973G>A (p.Val2325Ile)        |
| 1093190245 | <i>PALB2</i>        | c.49-6_49-4del                  |
| 1093190245 | <i>RAD51D</i>       | c.835G>A (p.Asp279Asn)          |
| 1093190246 | <i>BRIP1</i>        | c.890A>G (p.Lys297Arg)          |
| 1093190246 | <i>STK11</i>        | c.1211C>T (p.Ser404Phe)         |
| 1093190251 | <i>CHEK2</i>        | c.1461G>C (p.Gln487His)         |
| 1093190252 | <i>BRIP1</i>        | c.3079G>A (p.Glu1027Lys)        |

|            |                     |                          |
|------------|---------------------|--------------------------|
| 1093190257 | <i>NBN</i>          | c.511A>G (p.Ile171Val)   |
| 1093190262 | <i>APC</i>          | c.5894A>G (p.His1965Arg) |
| 1093190263 | <i>BRIP1</i>        | c.3746A>G (p.Lys1249Arg) |
| 1093190265 | <i>CDKN2A (P16)</i> | c.-33G>C                 |
| 1093190267 | <i>MUTYH</i>        | c.37-7G>A                |
| 1093190269 | <i>CDH1</i>         | c.2440-6C>G              |
| 1093190269 | <i>SMAD4</i>        | c.1106A>G (p.Asn369Ser)  |
| 1093190273 | <i>CDKN2A (P16)</i> | c.-2G>A                  |
| 1093190279 | <i>ATM</i>          | c.2096A>G (p.Glu699Gly)  |
| 1093190280 | <i>PMS2</i>         | c.572A>G (p.Tyr191Cys)   |
| 1093190280 | <i>PTEN</i>         | c.802-51_802-14del       |
| 1093190280 | <i>STK11</i>        | c.970C>G (p.Pro324Ala)   |
| 1093190284 | <i>ATM</i>          | c.2608A>G (p.Asn870Asp)  |
| 1093190284 | <i>ATM</i>          | c.3993+5G>T              |
| 1093190284 | <i>NBN</i>          | c.797C>T (p.Pro266Leu)   |
| 1093190284 | <i>TP53</i>         | c.139C>T (p.Pro47Ser)    |
| 1093190285 | <i>NBN</i>          | c.1882G>A (p.Glu628Lys)  |
| 1093190285 | <i>TP53</i>         | c.851C>T (p.Thr284Ile)   |
| 1093190286 | <i>ATM</i>          | c.544G>C (p.Val182Leu)   |
| 1093190286 | <i>PMS2</i>         | c.2347G>A (p.Val783Ile)  |
| 1093190287 | <i>BRCA2</i>        | c.8360G>A (p.Arg2787His) |
| 1095079850 | <i>BRIP1</i>        | c.550G>T (p.Asp184Tyr)   |
| 1095079852 | <i>BARD1</i>        | c.33G>T (p.Gln11His)     |
| 1095079854 | <i>CDKN2A (P16)</i> | c.-33G>C                 |
| 1095079855 | <i>ATM</i>          | c.5267C>G (p.Thr1756Arg) |
| 1095079857 | <i>MUTYH</i>        | c.1037C>T (p.Ser346Leu)  |
| 1095079860 | <i>BRIP1</i>        | c.2236A>G (p.Ile746Val)  |
| 1095079862 | <i>BRIP1</i>        | c.1961G>T (p.Gly654Val)  |
| 1095079865 | <i>RAD51C</i>       | c.890T>C (p.Leu297Pro)   |
| 1095079866 | <i>BARD1</i>        | c.33G>T (p.Gln11His)     |
| 1095079869 | <i>MSH2</i>         | c.797C>T (p.Ala266Val)   |
| 1095079871 | <i>APC</i>          | c.5026A>G (p.Arg1676Gly) |
| 1095079871 | <i>APC</i>          | c.7399C>A (p.Pro2467Thr) |
| 1095079872 | <i>CDH1</i>         | c.88C>A (p.Pro30Thr)     |
| 1095079872 | <i>CHEK2</i>        | c.14C>T (p.Ser5Leu)      |
| 1095079878 | <i>BRCA2</i>        | c.6413T>A (p.Val2138Asp) |
| 1095079878 | <i>CDKN2A (P16)</i> | c.146T>C (p.Ile49Thr)    |
| 1095079879 | <i>ATM</i>          | c.3961A>G (p.Met1321Val) |
| 1095079889 | <i>ATM</i>          | c.4424A>G (p.Tyr1475Cys) |
| 1095079892 | <i>PALB2</i>        | c.1250C>A (p.Ser417Tyr)  |
| 1095079896 | <i>PTEN</i>         | c.802-51_802-14del       |
| 1095079899 | <i>APC</i>          | c.7570A>G (p.Lys2524Glu) |
| 1095079904 | <i>PMS2</i>         | c.2108C>T (p.Thr703Met)  |
| 1095079907 | <i>BRIP1</i>        | c.890A>G (p.Lys297Arg)   |
| 1095079908 | <i>CDKN2A (P16)</i> | c.-25C>T                 |
| 1095079908 | <i>MSH2</i>         | c.114C>G (p.Asp38Glu)    |
| 1095079908 | <i>PTEN</i>         | c.802-51_802-14del       |
| 1095079908 | <i>TP53</i>         | c.139C>T (p.Pro47Ser)    |
| 1095079909 | <i>ATM</i>          | c.5071A>C (p.Ser1691Arg) |
| 1095079913 | <i>MLH1</i>         | c.100G>A (p.Glu34Lys)    |

|            |                        |                          |
|------------|------------------------|--------------------------|
| 1095079914 | <i>BMPR1A</i>          | c.1141C>G (p.Leu381Val)  |
| 1095079917 | <i>MUTYH</i>           | c.700G>A (p.Val234Met)   |
| 1095079933 | <i>APC</i>             | c.2586C>G (p.Asn862Lys)  |
| 1095079933 | <i>CDH1</i>            | c.892G>A (p.Ala298Thr)   |
| 1095079934 | <i>MSH2</i>            | c.1897A>G (p.Ile633Val)  |
| 1095079934 | <i>RAD51C</i>          | c.376G>A (p.Ala126Thr)   |
| 1095079935 | <i>NBN</i>             | c.511A>G (p.Ile171Val)   |
| 1095079937 | <i>CHEK2</i>           | c.470T>C (p.Ile157Thr)   |
| 1095079939 | <i>MSH2</i>            | c.2105T>G (p.Val702Gly)  |
| 1095079941 | <i>SMAD4</i>           | c.1573A>G (p.Ile525Val)  |
| 1095079944 | <i>CDH1</i>            | c.2635G>A (p.Gly879Ser)  |
| 1095111827 | <i>PALB2</i>           | c.2816T>G (p.Leu939Trp)  |
| 1095112405 | <i>APC</i>             | dup exon 13              |
| 1095112405 | <i>ATM</i>             | dup exon 23              |
| 1095112405 | <i>CDKN2A (P14ARF)</i> | c.217A>C (p.Ser73Arg)    |
| 1095112406 | <i>MUTYH</i>           | c.322A>G (p.Lys108Glu)   |
| 1095112412 | <i>APC</i>             | c.8276G>A (p.Arg2759His) |
| 1095112412 | <i>TP53</i>            | c.845G>A (p.Arg282Gln)   |
| 1095112413 | <i>BRIP1</i>           | c.584T>C (p.Leu195Pro)   |
| 1095112417 | <i>MSH6</i>            | c.1180T>G (p.Ser394Ala)  |
| 1095112420 | <i>PTEN</i>            | c.235G>A (p.Ala79Thr)    |
| 1095112424 | <i>ATM</i>             | c.3787A>G (p.Ser1263Gly) |
| 1095112425 | <i>NBN</i>             | c.37+5G>A                |
| 1095112426 | <i>APC</i>             | c.7352C>A (p.Thr2451Asn) |
| 1095112426 | <i>ATM</i>             | c.2804C>T (p.Thr935Met)  |
| 1095112426 | <i>SMAD4</i>           | c.455-6A>G               |
| 1095112428 | <i>CDK4</i>            | c.409G>A (p.Val137Ile)   |
| 1095112430 | <i>CDK4</i>            | c.684-4A>T               |
| 1095112437 | <i>APC</i>             | c.8141G>A (p.Arg2714His) |
| 1095112440 | <i>ATM</i>             | c.2932T>C (p.Ser978Pro)  |
| 1095112444 | <i>BRIP1</i>           | c.2220G>T (p.Gln740His)  |
| 1095112447 | <i>MSH2</i>            | c.1595T>C (p.Val532Ala)  |
| 1095112454 | <i>NBN</i>             | c.283G>C (p.Asp95His)    |
| 1095112458 | <i>NBN</i>             | c.511A>G (p.Ile171Val)   |
| 1095112461 | <i>PALB2</i>           | c.3307G>A (p.Val1103Met) |
| 1095112463 | <i>BRIP1</i>           | c.1655T>C (p.Ile552Thr)  |
| 1095112463 | <i>PALB2</i>           | c.3191A>T (p.Tyr1064Phe) |
| 1095112466 | <i>APC</i>             | c.848G>A (p.Arg283Gln)   |
| 1095112468 | <i>ATM</i>             | c.5653A>G (p.Thr1885Ala) |
| 1095112471 | <i>APC</i>             | c.3161A>C (p.His1054Pro) |
| 1095112475 | <i>PALB2</i>           | c.-5G>T                  |
| 1095112476 | <i>ATM</i>             | c.8268+6T>A              |
| 1095112479 | <i>CHEK2</i>           | c.1607C>T (p.Pro536Leu)  |
| 1095112479 | <i>PMS2</i>            | c.1247C>G (p.Ser416Cys)  |
| 1095112480 | <i>BRIP1</i>           | c.430G>A (p.Ala144Thr)   |
| 1095112484 | <i>BRIP1</i>           | c.890A>G (p.Lys297Arg)   |
| 1095112485 | <i>MSH6</i>            | c.261-14C>A              |
| 1095112485 | <i>MUTYH</i>           | c.1255G>A (p.Ala419Thr)  |
| 1095112488 | <i>APC</i>             | c.3535T>A (p.Tyr1179Asn) |
| 1095112488 | <i>BMPR1A</i>          | c.1433G>A (p.Arg478His)  |

|            |                     |                          |
|------------|---------------------|--------------------------|
| 1095112488 | <i>NBN</i>          | c.37+5G>A                |
| 1095112491 | <i>ATM</i>          | c.1229T>C (p.Val410Ala)  |
| 1095112492 | <i>CHEK2</i>        | c.1217G>A (p.Arg406His)  |
| 1095112493 | <i>ATM</i>          | c.3137T>C (p.Leu1046Pro) |
| 1095112496 | <i>BARD1</i>        | c.1409A>G (p.Asn470Ser)  |
| 1095188497 | <i>PTEN</i>         | c.802-51_802-14del       |
| 1095188500 | <i>CHEK2</i>        | c.1525C>T (p.Pro509Ser)  |
| 1095188501 | <i>BRIP1</i>        | c.584T>C (p.Leu195Pro)   |
| 1095188508 | <i>ATM</i>          | c.6995T>C (p.Leu2332Pro) |
| 1095188508 | <i>TP53</i>         | c.139C>T (p.Pro47Ser)    |
| 1095188510 | <i>APC</i>          | c.6512G>A (p.Gly2171Glu) |
| 1095188512 | <i>PMS2</i>         | c.883C>T (p.Arg295Trp)   |
| 1095188513 | <i>BRIP1</i>        | c.139C>G (p.Pro47Ala)    |
| 1095188515 | <i>MUTYH</i>        | c.925C>T (p.Arg309Cys)   |
| 1095188515 | <i>PALB2</i>        | c.2674G>A (p.Glu892Lys)  |
| 1095188516 | <i>TP53</i>         | c.1150A>G (p.Met384Val)  |
| 1095188519 | <i>PMS2</i>         | c.1420G>T (p.Ala474Ser)  |
| 1095188520 | <i>ATM</i>          | c.5071A>C (p.Ser1691Arg) |
| 1095188521 | <i>RAD51D</i>       | c.568G>A (p.Ala190Thr)   |
| 1095188521 | <i>RAD51D</i>       | c.481-7G>A               |
| 1095188532 | <i>APC</i>          | c.4088A>G (p.Lys1363Arg) |
| 1095188541 | <i>ATM</i>          | c.186-7C>T               |
| 1095188541 | <i>BRIP1</i>        | c.2236A>G (p.Ile746Val)  |
| 1095188546 | <i>APC</i>          | c.2204C>T (p.Ala735Val)  |
| 1095188546 | <i>ATM</i>          | c.496+4T>C               |
| 1095188546 | <i>MUTYH</i>        | c.1276C>T (p.Arg426Cys)  |
| 1095188546 | <i>RAD51C</i>       | c.790G>A (p.Gly264Ser)   |
| 1095188547 | <i>MSH6</i>         | c.124C>T (p.Pro42Ser)    |
| 1095188547 | <i>MSH6</i>         | c.1932G>C (p.Arg644Ser)  |
| 1095188547 | <i>RAD51D</i>       | c.146C>T (p.Ala49Val)    |
| 1095188550 | <i>STK11</i>        | c.1283C>G (p.Ser428Trp)  |
| 1095188551 | <i>CDH1</i>         | c.88C>A (p.Pro30Thr)     |
| 1095188556 | <i>BARD1</i>        | c.709C>G (p.Gln237Glu)   |
| 1095188564 | <i>ATM</i>          | c.1744T>C (p.Phe582Leu)  |
| 1095188566 | <i>MSH2</i>         | c.490G>A (p.Gly164Arg)   |
| 1095188574 | <i>ATM</i>          | c.1810C>T (p.Pro604Ser)  |
| 1095188579 | <i>ATM</i>          | c.131A>T (p.Asp44Val)    |
| 1095188581 | <i>STK11</i>        | c.1211C>T (p.Ser404Phe)  |
| 1095188586 | <i>ATM</i>          | c.6988C>G (p.Leu2330Val) |
| 1095188588 | <i>BMPR1A</i>       | c.1355A>G (p.Glu452Gly)  |
| 1095188588 | <i>PALB2</i>        | c.194C>T (p.Pro65Leu)    |
| 1095214770 | <i>CDKN2A (P16)</i> | c.-33G>C                 |
| 1095214770 | <i>MLH1</i>         | c.-43C>T                 |
| 1095214818 | <i>TP53</i>         | c.97-6C>T                |
| 1095216809 | <i>PMS2</i>         | c.2174C>T (p.Ala725Val)  |
| 1095216810 | <i>CHEK2</i>        | c.410G>A (p.Arg137Gln)   |
| 1095216811 | <i>MLH1</i>         | c.1937A>G (p.Tyr646Cys)  |
| 1095216813 | <i>NBN</i>          | c.2146A>G (p.Asn716Asp)  |
| 1095216822 | <i>CDKN2A (P16)</i> | c.206A>G (p.Glu69Gly)    |
| 1095216822 | <i>CHEK2</i>        | c.14C>T (p.Ser5Leu)      |

|            |               |                          |
|------------|---------------|--------------------------|
| 1095216825 | <i>BRIP1</i>  | c.890A>G (p.Lys297Arg)   |
| 1095216826 | <i>PMS2</i>   | c.163+4A>G               |
| 1095216830 | <i>APC</i>    | c.6236A>C (p.Asp2079Ala) |
| 1095216830 | <i>BRIP1</i>  | c.2285G>A (p.Arg762His)  |
| 1095216833 | <i>ATM</i>    | c.7592T>C (p.Met2531Thr) |
| 1095216833 | <i>BARD1</i>  | c.2282G>A (p.Ser761Asn)  |
| 1095216836 | <i>BMPR1A</i> | c.1432C>T (p.Arg478Cys)  |
| 1095216850 | <i>NBN</i>    | c.2146A>G (p.Asn716Asp)  |
| 1095216850 | <i>PMS2</i>   | c.1556A>G (p.Tyr519Cys)  |
| 1095216850 | <i>PMS2</i>   | c.1559C>T (p.Ala520Val)  |
| 1095216851 | <i>NBN</i>    | c.832T>G (p.Ser278Ala)   |
| 1095216852 | <i>NBN</i>    | c.1882G>A (p.Glu628Lys)  |
| 1095216871 | <i>ATM</i>    | c.7912T>G (p.Trp2638Gly) |
| 1095216871 | <i>BRIP1</i>  | c.430G>A (p.Ala144Thr)   |
| 1095216871 | <i>MUTYH</i>  | c.74G>A (p.Gly25Asp)     |
| 1095216871 | <i>MUTYH</i>  | c.53C>T (p.Pro18Leu)     |
| 1095216875 | <i>APC</i>    | c.4072G>A (p.Ala1358Thr) |
| 1095216879 | <i>ATM</i>    | c.6067G>A (p.Gly2023Arg) |
| 1095216882 | <i>MSH2</i>   | c.1760-7T>C              |
| 1095216883 | <i>BRIP1</i>  | c.790C>T (p.Arg264Trp)   |
| 1095216895 | <i>CDH1</i>   | c.1234G>A (p.Val412Ile)  |
| 1095216897 | <i>RAD51C</i> | c.376G>A (p.Ala126Thr)   |
| 1095216899 | <i>BARD1</i>  | c.1738G>A (p.Glu580Lys)  |
| 1095216899 | <i>NBN</i>    | c.2146A>G (p.Asn716Asp)  |
| 1095216899 | <i>PTEN</i>   | c.802-51_802-14del       |
| 1097148993 | <i>ATM</i>    | c.7522G>A (p.Gly2508Arg) |
| 1097148993 | <i>CDH1</i>   | c.2635G>A (p.Gly879Ser)  |
| 1097148999 | <i>PMS2</i>   | c.857A>G (p.Asp286Gly)   |
| 1097149000 | <i>APC</i>    | c.2222A>G (p.Asn741Ser)  |
| 1097149002 | <i>ATM</i>    | c.2289T>A (p.Phe763Leu)  |
| 1097149005 | <i>MLH1</i>   | c.739T>C (p.Ser247Pro)   |
| 1097149006 | <i>CDH1</i>   | c.2512A>G (p.Ser838Gly)  |
| 1097149006 | <i>PALB2</i>  | c.2903C>G (p.Ala968Gly)  |
| 1097149010 | <i>ATM</i>    | c.1810C>T (p.Pro604Ser)  |
| 1097149010 | <i>ATM</i>    | c.2494C>T (p.Arg832Cys)  |
| 1097149010 | <i>RAD51D</i> | c.695G>A (p.Arg232Gln)   |
| 1097149011 | <i>NBN</i>    | c.456G>A (p.Met152Ile)   |
| 1097149013 | <i>ATM</i>    | c.6067G>A (p.Gly2023Arg) |
| 1097149014 | <i>APC</i>    | c.7808A>G (p.Glu2603Gly) |
| 1097149016 | <i>BRIP1</i>  | c.550G>T (p.Asp184Tyr)   |
| 1097149017 | <i>TP53</i>   | c.139C>T (p.Pro47Ser)    |
| 1097149018 | <i>TP53</i>   | c.97-6C>T                |
| 1097149019 | <i>BRIP1</i>  | c.3262C>T (p.His1088Tyr) |
| 1097149019 | <i>CHEK2</i>  | c.470T>C (p.Ile157Thr)   |
| 1097149020 | <i>MSH6</i>   | c.1822A>G (p.Ile608Val)  |
| 1097149025 | <i>BRCA2</i>  | c.3581G>A (p.Gly1194Asp) |
| 1097149030 | <i>APC</i>    | c.3323A>G (p.Asn1108Ser) |
| 1097149030 | <i>RAD51D</i> | c.629C>T (p.Ala210Val)   |
| 1097149031 | <i>STK11</i>  | c.336G>C (p.Gln112His)   |
| 1097149032 | <i>BARD1</i>  | c.668A>G (p.Glu223Gly)   |

|            |                     |                               |
|------------|---------------------|-------------------------------|
| 1097149034 | <i>ATM</i>          | c.186-7C>T                    |
| 1097149034 | <i>BRIP1</i>        | c.3378A>C (p.Glu1126Asp)      |
| 1097149043 | <i>BMPR1A</i>       | c.499A>G (p.Met167Val)        |
| 1097149045 | <i>PALB2</i>        | c.400G>A (p.Asp134Asn)        |
| 1097149046 | <i>MSH6</i>         | c.3758T>C (p.Val1253Ala)      |
| 1097149047 | <i>APC</i>          | c.6985A>G (p.Ile2329Val)      |
| 1097149048 | <i>BARD1</i>        | c.1738G>A (p.Glu580Lys)       |
| 1097149052 | <i>BMPR1A</i>       | c.1327C>T (p.Arg443Cys)       |
| 1097149054 | <i>MSH6</i>         | c.2926C>T (p.Arg976Cys)       |
| 1097149054 | <i>NBN</i>          | c.1489A>G (p.Thr497Ala)       |
| 1097149054 | <i>PTEN</i>         | c.802-51_802-14del            |
| 1097149055 | <i>MSH6</i>         | c.949A>G (p.Lys317Glu)        |
| 1097149056 | <i>APC</i>          | c.835G>T (p.Gly279Cys)        |
| 1097149056 | <i>ATM</i>          | c.1229T>C (p.Val410Ala)       |
| 1097149056 | <i>BRIP1</i>        | c.10A>G (p.Met4Val)           |
| 1097149056 | <i>PALB2</i>        | c.2027T>C (p.Ile676Thr)       |
| 1097149057 | <i>ATM</i>          | c.4414T>G (p.Leu1472Val)      |
| 1097149057 | <i>BRCA2</i>        | c.9442G>T (p.Ala3148Ser)      |
| 1097149059 | <i>BMPR1A</i>       | c.1439G>T (p.Arg480Leu)       |
| 1097149060 | <i>BRIP1</i>        | c.2236A>G (p.Ile746Val)       |
| 1097149060 | <i>NBN</i>          | c.797C>T (p.Pro266Leu)        |
| 1097149061 | <i>ATM</i>          | c.1744T>C (p.Phe582Leu)       |
| 1097149062 | <i>PTEN</i>         | c.349A>C (p.Asn117His)        |
| 1097149065 | <i>PALB2</i>        | c.821C>T (p.Thr274Ile)        |
| 1097149066 | <i>BRIP1</i>        | c.550G>T (p.Asp184Tyr)        |
| 1097149066 | <i>TP53</i>         | c.704A>G (p.Asn235Ser)        |
| 1097149067 | <i>CHEK2</i>        | c.538C>T (p.Arg180Cys)        |
| 1097149070 | <i>CDH1</i>         | c.892G>A (p.Ala298Thr)        |
| 1097149070 | <i>MLH1</i>         | c.1637A>G (p.Lys546Arg)       |
| 1097149072 | <i>PALB2</i>        | c.2201C>A (p.Thr734Asn)       |
| 1097149074 | <i>BRIP1</i>        | c.370A>G (p.Thr124Ala)        |
| 1097149083 | <i>CDKN2A (P16)</i> | c.-2G>A                       |
| 1097149085 | <i>BRCA1</i>        | c.655G>A (p.Asp219Asn)        |
| 1097149086 | <i>MLH1</i>         | c.1761G>A (p.Met587Ile)       |
| 1097149086 | <i>NBN</i>          | c.1489A>G (p.Thr497Ala)       |
| 1097162627 | <i>PALB2</i>        | c.653A>T (p.Glu218Val)        |
| 1097162628 | <i>ATM</i>          | c.2362A>C (p.Ser788Arg)       |
| 1097162628 | <i>ATM</i>          | c.6088A>G (p.Ile2030Val)      |
| 1097162633 | <i>ATM</i>          | c.544G>C (p.Val182Leu)        |
| 1097162633 | <i>NBN</i>          | c.797C>T (p.Pro266Leu)        |
| 1097162638 | <i>MUTYH</i>        | c.998-9C>T                    |
| 1097162639 | <i>ATM</i>          | c.6919C>T (p.Leu2307Phe)      |
| 1097162639 | <i>RAD51C</i>       | c.146-8A>G                    |
| 1097162641 | <i>APC</i>          | c.277C>G (p.Leu93Val)         |
| 1097162643 | <i>ATM</i>          | c.8968G>A (p.Glu2990Lys)      |
| 1097162646 | <i>MSH6</i>         | c.3762_3764del (p.Glu1254del) |
| 1097162647 | <i>ATM</i>          | c.3077+4G>A                   |
| 1097162647 | <i>ATM</i>          | c.544G>C (p.Val182Leu)        |
| 1097162650 | <i>PALB2</i>        | c.2135C>T (p.Ala712Val)       |
| 1097162653 | <i>BMPR1A</i>       | c.1204G>T (p.Val402Leu)       |

|            |                     |                                  |
|------------|---------------------|----------------------------------|
| 1097162653 | <i>MUTYH</i>        | c.56G>A (p.Arg19Gln)             |
| 1097162655 | <i>BRIP1</i>        | c.752G>A (p.Arg251His)           |
| 1097162656 | <i>BMPR1A</i>       | c.1327C>T (p.Arg443Cys)          |
| 1097162656 | <i>CDKN2A (P16)</i> | c.-25C>T                         |
| 1097162661 | <i>CHEK2</i>        | c.1076A>G (p.Glu359Gly)          |
| 1097162662 | <i>ATM</i>          | c.5071A>C (p.Ser1691Arg)         |
| 1097162668 | <i>BARD1</i>        | c.2191C>T (p.Arg731Cys)          |
| 1097162668 | <i>BARD1</i>        | c.1601C>T (p.Thr534Ile)          |
| 1097162668 | <i>MSH2</i>         | c.1690A>G (p.Thr564Ala)          |
| 1097162669 | <i>MSH6</i>         | c.3731T>C (p.Leu1244Ser)         |
| 1097162670 | <i>RAD51C</i>       | c.376G>A (p.Ala126Thr)           |
| 1097162672 | <i>BRIP1</i>        | c.1000G>T (p.Ala334Ser)          |
| 1097162675 | <i>MLH1</i>         | c.1649T>C (p.Leu550Pro)          |
| 1097162677 | <i>MSH6</i>         | c.3190G>C (p.Ala1064Pro)         |
| 1097162677 | <i>TP53</i>         | c.139C>T (p.Pro47Ser)            |
| 1097162678 | <i>PALB2</i>        | c.2135C>T (p.Ala712Val)          |
| 1097162680 | <i>ATM</i>          | c.1810C>T (p.Pro604Ser)          |
| 1097162680 | <i>ATM</i>          | c.4388T>G (p.Phe1463Cys)         |
| 1097162684 | <i>ATM</i>          | c.1229T>C (p.Val410Ala)          |
| 1097162686 | <i>NBN</i>          | c.2146A>G (p.Asn716Asp)          |
| 1097162686 | <i>STK11</i>        | c.894C>A (p.Phe298Leu)           |
| 1097162687 | <i>BRCA2</i>        | c.5270A>G (p.Tyr1757Cys)         |
| 1097162691 | <i>BRCA2</i>        | c.5284T>G (p.Tyr1762Asp)         |
| 1097162695 | <i>MUTYH</i>        | c.1417G>A (p.Ala473Thr)          |
| 1097162696 | <i>APC</i>          | c.6068G>T (p.Arg2023Ile)         |
| 1097162699 | <i>ATM</i>          | c.4091A>G (p.Asp1364Gly)         |
| 1097162699 | <i>CHEK2</i>        | c.320-5T>A                       |
| 1097162700 | <i>ATM</i>          | c.3925G>A (p.Ala1309Thr)         |
| 1097162704 | <i>PTEN</i>         | c.802-51_802-14del               |
| 1097162709 | <i>MSH2</i>         | c.2211-5T>G                      |
| 1097162710 | <i>ATM</i>          | c.6067G>A (p.Gly2023Arg)         |
| 1097162712 | <i>APC</i>          | c.4018_4020dupTCT (p.Ser1341dup) |
| 1097162713 | <i>CDH1</i>         | c.2104G>A (p.Glu702Lys)          |
| 1097162716 | <i>MUTYH</i>        | c.481G>C (p.Asp161His)           |
| 1097162717 | <i>ATM</i>          | c.5890A>G (p.Lys1964Glu)         |
